# Supplementary material for: Using WGCNA and transcriptome profiling to identify hub genes for salt stress tolerance in germinating soybean seeds
Source: Frontiers journal article supplement (doi:10.3389/fpls.2025.1569565), 2025-08-08
Supplement: Data_Sheet_1.zip [file Data_Sheet_1.zip]

## Sheet: Sheet1
GeneName	log2FoldChange	pValue	result	GeneDescription
Glyma.20G245600	-0.176632	0.921136	-	-
Glyma.20G018700	-9.15214	0.695369	-	hypothetical protein GLYMA_20G018700v4
Glyma.06G047000	-0.238167	0.7554334166619999	-	LIM domain-containing protein WLIM1-like
Glyma.02G267700	-10.17	0.0308831	-	hypothetical protein GLYMA_02G267700v4
Glyma.11G096000	1.1587316023799998	0.00314396448013	up	scarecrow-like protein 3 isoform X1
Glyma.13G289800	-0.911464	0.119289	-	shaggy-related protein kinase eta isoform X1
Glyma.04G027100	-0.964929	0.0234332	-	uncharacterized protein LOC100786493
Glyma.04G010300	0.115184	0.648624	-	bZIP transcription factor bZIP125
Glyma.05G119600	-1.4794	0.718279	-	BRASSINOSTEROID INSENSITIVE 1-associated receptor kinase 1
Glyma.16G039200	0.5646676009489999	0.272872	-	hypothetical protein JHK86_044327
Glyma.06G109250	-7.04509	0.683558	-	hypothetical protein GLYMA_06G109250v4
Glyma.06G146300	-0.245428	0.99867	-	protein MIZU-KUSSEI 1
Glyma.13G243800	0.576051	0.38031622766900003	-	hypothetical protein JHK86_037382
Glyma.01G174300	0	1	-	ABC transporter F family member 1
Glyma.15G028000	0.71197	0.004757437264569999	-	hypothetical protein GLYMA_15G028000v4
Glyma.05G024000	-0.805814	0.512489	-	probable LRR receptor-like serine/threonine-protein kinase At1g74360
Glyma.06G068200	0.568258	0.176642	-	putative L-ascorbate peroxidase 6 isoform X1
Glyma.09G084700	1.42414	0.64756	-	cationic amino acid transporter 1
Glyma.10G021200	-1.83887	0.10406694836300001	-	thioredoxin superfamily protein
Glyma.15G044900	-0.666775	0.331969	-	interactor of constitutive active ROPs 3
Glyma.11G009100	0.95206	0.013503753026399999	-	hypothetical protein GLYMA_11G009100v4
Glyma.08G165700	-1.24021	0.0279507478773	-	nuclear factor Y transcription factor family
Glyma.14G034700	-2.91881	4.22547481018e-05	down	uncharacterized protein LOC100808831
Glyma.13G257800	0	1	-	protein PELPK1
Glyma.02G057700	0	1	-	proline-rich receptor-like protein kinase PERK4
Glyma.16G060900	-8.32415	0.587529	-	germin-like protein precursor
Glyma.08G354100	0	1	-	cytochrome b5
Glyma.20G083500	0.568649	0.08208976255639999	-	hypothetical protein GLYMA_20G083500v4
Glyma.11G156001	0	1	-	hypothetical protein GLYMA_11G156001v4
Glyma.01G027967	0	1	-	hypothetical protein GLYMA_01G027967v4
Glyma.16G113100	0.216764	0.304065	-	thioredoxin reductase NTRB
Glyma.02G074600	-1.46112	0.0213081277863	-	transmembrane protein 18
Glyma.03G161300	0.22831616718000003	0.463571	-	hypothetical protein GLYMA_03G161300v4
Glyma.07G208000	-1.11338	0.0429600232352	-	transcription factor bHLH153 isoform X2
Glyma.11G171773	0.550382	0.0442156928263	-	uncharacterized protein LOC100802231 isoform X1
Glyma.06G046900	-0.716629	0.15079	-	GPN-loop GTPase QQT1 isoform X1
Glyma.12G232700	-1.85804	0.0767870112084	-	hypothetical protein GLYMA_12G232700v4
Glyma.11G175955	0.55375	0.0402604330722	-	serine/threonine-protein phosphatase BSL3 isoform X1
Glyma.18G116601	2.23347	0.3235	-	hypothetical protein GLYMA_18G116601v4
Glyma.10G084900	0.668873	0.9206876671299999	-	uncharacterized protein LOC102667474
Glyma.01G100100	-0.813876	0.134371	-	mitotic-spindle organizing protein 1B
Glyma.02G306500	0.781849	0.23320055258900002	-	probable serine/threonine-protein kinase WNK11
Glyma.19G229800	-0.185595	0.996824	-	importin subunit alpha-2
Glyma.07G161800	-1.24324	0.100661	-	uncharacterized protein LOC100795400
Glyma.10G201200	0.6977464220690001	0.0218736411711	-	protein PSK SIMULATOR 3
Glyma.14G214000	0.14256243851199998	0.440532	-	DNA repair protein RAD4 isoform X1
Glyma.09G211550	-7.02617	0.695369	-	hypothetical protein GLYMA_09G211550v4
Glyma.20G053000	-1.10746	0.38445086925899996	-	sieve element occlusion o isoform X1
Glyma.11G097100	-1.28315	0.196088	-	uncharacterized protein LOC100817846
Glyma.04G182800	0.121681	0.876774	-	hypothetical protein GYH30_010342
Glyma.06G108850	-0.631571	0.690094	-	hypothetical protein GLYMA_06G108850v4
Glyma.04G242800	1.06064	0.173466	-	ACT domain-containing protein ACR3
Glyma.08G260500	-0.883703	0.208783	-	uncharacterized protein LOC100810665
Glyma.02G081300	7.463088365549999	0.318264	-	centromere-associated protein E
Glyma.07G248400	-1.3059	0.27024	-	flowering-promoting factor 1-like protein 3
Glyma.15G038700	-1.9009	0.000331455592467	down	actin
Glyma.16G107900	-1.64931	0.171896	-	rop guanine nucleotide exchange factor 14
Glyma.11G225300	0.5535478813970001	0.136026	-	hypothetical protein JHK86_032178
Glyma.14G023200	-0.271976	0.7241101208249999	-	syntaxin-61 isoform X1
Glyma.19G126600	-1.02522	0.40299156070799996	-	protein NRT1/ PTR FAMILY 3.1 isoform
Glyma.01G031700	-1.60203	0.010713965110799998	-	spermidine synthase 1-like
Glyma.18G112200	-9.25927	0.525596	-	hypothetical protein JHK86_049841
Glyma.09G231900	0	1	-	plant invertase/pectin methylesterase inhibitor-domain containing protein
Glyma.02G237700	-0.599174	0.19562	-	cytochrome b-c1 complex subunit 8
Glyma.13G343500	-0.312749	0.564473	-	uncharacterized protein LOC100810964
Glyma.18G294100	-0.944918	0.193294	-	protein PLASTID MOVEMENT IMPAIRED 2
Glyma.04G166400	0.899341	0.09582229573449999	-	hypothetical protein GYH30_010176
Glyma.12G064600	-1.73747	0.010279265617799998	-	UDP-glucuronic acid decarboxylase 6-like
Glyma.10G205233	2.2316	0.164854	-	uncharacterized protein LOC100800405
Glyma.09G204700	0	1	-	hypothetical protein JHK85_026330
Glyma.17G054200	-1.46834	0.022102081513200002	-	uncharacterized protein LOC100786089
Glyma.13G360600	2.01226	0.0018117254750799998	up	F-box/kelch-repeat protein At1g80440
Glyma.06G155750	-1.00282	0.0310026142306	-	hypothetical protein JHK85_015767
Glyma.19G189600	-0.861062	0.016759241314299997	-	60S ribosomal protein L24-like
Glyma.15G006500	-0.237379	0.896638	-	Zinc finger BED domain-containing protein DAYSLEEPER
Glyma.16G061900	0	1	-	hypothetical protein GLYMA_16G061900v4
Glyma.12G203200	0.927416	0.129355	-	Probable polyol transporter 4-like
Glyma.20G214900	0	1	-	-
Glyma.03G151900	0.17439325850499998	0.50587	-	probable aspartic proteinase GIP1 precursor
Glyma.05G229700	3.84469	0.0040161414871799994	up	protein NRT1/ PTR FAMILY 1.2
Glyma.13G159550	-1.27211	0.9880703271179999	-	hypothetical protein GLYMA_13G159550v4
Glyma.11G235600	0.7260924107469999	0.0903602143107	-	WEB family protein At2g40480 isoform X2
Glyma.05G165451	0	1	-	hypothetical protein GLYMA_05G165451v4
Glyma.09G215301	1.0533313362999999	0.0498891767999	-	F-box/kelch-repeat protein SKIP25
Glyma.10G257700	0	1	-	hypothetical protein GYH30_029141
Glyma.06G061400	-0.289037	0.6903818268999999	-	BTB/POZ domain-containing protein NPY1 isoform X1
Glyma.08G044700	0.419935	0.09546537232339998	-	zinc finger protein BRUTUS isoform X3
Glyma.08G296000	0.08401417007269998	0.625575	-	protein NRT1/ PTR FAMILY 4.6
Glyma.11G181800	0.618138	0.7031987135879999	-	hypothetical protein JHK87_031109
Glyma.12G050200	0.0911252637782	0.395903	-	hypothetical protein GYH30_032746
Glyma.07G131400	-1.87704	0.26495001361299997	-	hypothetical protein GYH30_018262
Glyma.13G035600	7.49196	0.5987223871790001	-	gibberellin 20 oxidase 2
Glyma.13G179800	-2.33331	0.125901	-	uncharacterized protein LOC100527569
Glyma.18G179300	-0.0580175	0.825981	-	WUSCHEL-related homeobox 3
Glyma.07G067100	0.45262	0.0953902100806	-	N6-adenosine-methyltransferase MT-A70-like
Glyma.07G228500	-0.128013	0.891291	-	hypothetical protein GYH30_019293
Glyma.03G200700	1.44445	0.000762522656878	up	uncharacterized protein LOC100305710
Glyma.07G263500	-1.79506	0.482799	-	subtilisin-like protease SBT2.4
Glyma.05G158100	-0.849129	0.00800750281385	-	14-3-3-like protein C isoform 1
Glyma.18G105400	0.527723	0.329351	-	HVA22-like protein f
Glyma.18G003300	2.54559	3.81567792138e-05	up	uncharacterized protein LOC114395748
Glyma.12G001800	0.195159	0.32192546177700004	-	hypothetical protein JHK85_033104
Glyma.04G181200	-0.722315	0.0772141	-	protein DSS1 HOMOLOG ON CHROMOSOME V
Glyma.09G092400	0	1	-	hypothetical protein GYH30_024507
Glyma.03G214700	-1.00555	0.146394	-	UDP-glucuronic acid decarboxylase 2
Glyma.13G179100	-0.195478	0.9476479365430001	-	hypothetical protein JHK87_036541
Glyma.13G159800	-0.00602173	0.7586280724600001	-	zinc finger BED domain-containing protein DAYSLEEPER-like
Glyma.18G215400	0.6435915236590001	0.025412750252099995	-	ataxin-10
Glyma.10G148900	-1.32931	0.523785	-	exonuclease DPD1, chloroplastic/mitochondrial
Glyma.15G065001	8.0849	0.5987223871790001	-	hypothetical protein GLYMA_15G065001v4
Glyma.08G029300	-0.287223	0.598752	-	K(+) efflux antiporter 4
Glyma.07G030600	0.45625068680200004	0.16560218601399998	-	uncharacterized protein LOC100789589 isoform X1
Glyma.04G064100	0.461752	0.181535	-	homeobox protein knotted-1-like 3 isoform X2
Glyma.14G093300	-2.5673	0.457887	-	NADH-quinone oxidoreductase subunit B 1
Glyma.06G044300	-9.83352	0.0483054590957	-	pumilio homolog 12
Glyma.01G175800	-0.0819517	0.838464	-	hypothetical protein JHK85_002166
Glyma.10G106900	-0.95744	0.0221431987286	-	S-formylglutathione hydrolase
Glyma.13G267300	-3.35749	5.43797555632e-05	down	hypothetical protein GYH30_037486
Glyma.05G219400	-1.75778	0.00011414244560500001	down	ER-binding immunoglobulin protein BiP4 precursor
Glyma.12G189800	-0.445385	0.360591	-	glycosyltransferase BC10
Glyma.11G228600	-0.373372	0.531104	-	protein yippee-like
Glyma.06G287400	15.631348172300001	2.4508849319e-08	up	GDSL esterase/lipase At1g29670
Glyma.06G266200	0	1	-	hypothetical protein GLYMA_06G266200v4
Glyma.04G055200	-0.216954	0.9741810072399999	-	Mechanosensitive ion channel protein 10 isoform
Glyma.01G046400	-2.07436	0.00010818593701200001	down	origin of replication complex subunit 6
Glyma.10G065600	-1.0555	0.291517	-	glucomannan 4-beta-mannosyltransferase 9
Glyma.01G212600	-0.14434	0.978043	-	uncharacterized protein LOC100779828
Glyma.16G089700	-2.95029	0.0144722893294	-	hypothetical protein JHK86_044825
Glyma.16G175500	-1.89744	0.0013422753184800002	down	isoflavone 7-O-glucosyltransferase UGT8
Glyma.13G334000	-2.17849	0.31299099636300004	-	uncharacterized protein LOC102670437
Glyma.03G228500	0.0958155699588	0.5534793172029999	-	uncharacterized protein LOC100808926 isoform X1
Glyma.17G145200	-0.701097	0.7991910118209999	-	hypothetical protein GLYMA_17G145200v4
Glyma.08G118000	2.01509	0.006659746114640001	up	uncharacterized protein LOC100814411
Glyma.02G020000	-0.810239	0.214252	-	Ubiquitin-conjugating enzyme E2 2-like
Glyma.14G130000	-1.87304	0.0676509934532	-	molybdate transporter 1
Glyma.17G021700	0.542466	0.07878290977699999	-	hypothetical protein GLYMA_17G021700v4
Glyma.05G015200	0.532511	0.114963	-	G patch domain-containing protein TGH
Glyma.18G255500	-2.05977	0.40434	-	uncharacterized protein LOC100779334
Glyma.10G062500	0.22036	0.744844	-	hypothetical protein JHK87_026967
Glyma.04G118000	0	1	-	hypothetical protein JHK86_009768
Glyma.13G222000	-0.736936	0.798949	-	ABC transporter B family member 9-like
Glyma.16G200050	0	1	-	hypothetical protein GLYMA_16G200050v4
Glyma.11G091500	-0.859742	0.012809444942700001	-	WD-40 repeat-containing protein MSI3
Glyma.15G008433	0	1	-	hypothetical protein GLYMA_15G008433v4
Glyma.19G022800	-1.15521	0.14756336385500002	-	structural maintenance of chromosomes protein 4
Glyma.02G179900	-1.11152	0.011435642162399999	-	chaperone protein dnaJ 6
Glyma.10G055100	-0.442962	0.310258	-	hypothetical protein GYH30_027062
Glyma.07G221100	0.710528	0.030131044082900002	-	hypothetical protein GLYMA_07G221100v4
Glyma.07G013700	-3.37057	0.0032114216001300003	down	hypothetical protein GYH30_017070
Glyma.07G264100	-0.749541	0.33701259386200005	-	uncharacterized protein LOC106799504
Glyma.11G121500	-0.897757	0.207557	-	putative pentatricopeptide repeat-containing protein At3g18840
Glyma.18G245400	0.00296489048518	0.742727	-	uncharacterized protein LOC100799163
Glyma.01G233400	7.93363	0.627702	-	transcription factor MYB53
Glyma.03G106400	-5.82697	0.695369	-	receptor like protein kinase S.2
Glyma.15G053800	-0.711468	0.211513	-	outer envelope protein 64, mitochondrial isoform
Glyma.11G236600	1.8270005549400001	0.024765024155000002	-	probable E3 ubiquitin-protein ligase XERICO
Glyma.18G253600	0.463934	0.37155	-	cationic amino acid transporter 9, chloroplastic
Glyma.17G004700	1.32407	0.030821488339999998	-	C2 and GRAM domain-containing protein At1g03370
Glyma.07G233500	-0.267713	0.7454272376540001	-	importin beta-like SAD2 isoform X1
Glyma.18G097100	0.333821	0.08765341375630001	-	uncharacterized protein LOC100801304
Glyma.07G244800	-0.0744163	0.7786322673630001	-	uncharacterized protein LOC100818469
Glyma.13G189300	0.929353	0.338534	-	hypothetical protein GLYMA_13G189300v4
Glyma.18G087500	0	1	-	hypothetical protein GLYMA_18G087500v4
Glyma.16G211300	-1.92392	0.21488	-	hypothetical protein GLYMA_16G211300v4
Glyma.08G150200	0.0769081781126	0.38372097106299996	-	uncharacterized protein LOC100306615
Glyma.01G225200	-0.407551	0.407695	-	long chain acyl-CoA synthetase 4
Glyma.17G228451	0.215471	0.876774	-	hypothetical protein GLYMA_17G228451v4
Glyma.03G084000	0.495206	0.156009	-	RIN4a protein
Glyma.10G014100	-1.93381	6.84296131336e-06	down	hypothetical protein GLYMA_10G014100v4
Glyma.12G233800	0.055472612437399996	0.610679	-	protein VTE6, chloroplastic
Glyma.13G211400	0.130259	0.374132	-	protein DOS2
Glyma.02G100000	2.6339	1.43473372972e-05	up	serine/threonine-protein kinase STN7, chloroplastic
Glyma.03G043100	-0.203724	0.9205803775570001	-	hypothetical protein GLYMA_03G043020v4
Glyma.05G194500	-0.115257	0.966129	-	auxilin-related protein 2
Glyma.04G080100	-0.420948	0.96777	-	hypothetical protein GYH30_009293
Glyma.20G095000	-0.874782	0.038009596184900005	-	hypothetical protein GLYMA_20G095000v4
Glyma.07G062000	0	1	-	hypothetical protein JHK87_017641
Glyma.09G046300	0.887838	0.029101893514099995	-	hypothetical protein GLYMA_09G046300v4
Glyma.03G152100	-0.283298	0.663398	-	small nuclear ribonucleoprotein SmD1a
Glyma.13G167002	-8.15681	0.716587	-	hypothetical protein GLYMA_13G167002v4
Glyma.14G182700	1.22795	0.0018765796901699999	up	serine/threonine-protein kinase CTR1 isoform X3
Glyma.18G265200	-4.89396	0.00024016206158500002	down	protein WVD2-like 4
Glyma.04G157200	-0.0144191	0.54524	-	cyclic nucleotide-gated ion channel 17 isoform
Glyma.U032208	0.195704	0.515245	-	protein kinase PINOID
Glyma.16G022900	-1.23483	0.00791992712943	down	dof zinc finger protein DOF2.5
Glyma.03G122200	-0.497063	0.70025	-	auxin-induced protein 5NG4-like
Glyma.16G063300	-1.42711	0.0465829421742	-	hypothetical protein GLYMA_16G063300v4
Glyma.09G047600	0.196457	0.9595834675079999	-	probable purine permease 4
Glyma.06G262400	-6.68762	0.695369	-	hypothetical protein GYH30_016337
Glyma.20G052300	0.938393	0.153757	-	hypothetical protein GLYMA_20G052300v4
Glyma.08G351800	-1.80586	0.032092054080500004	-	1-aminocyclopropane-1-carboxylate oxidase homolog 12
Glyma.10G078200	-1.81448	0.000353865925881	down	hypothetical protein JHK87_027141
Glyma.10G178000	0.6653075128329999	0.0794355064523	-	AT-hook motif nuclear-localized protein 6
Glyma.12G168700	8.5604	0.5987223871790001	-	hypothetical protein GYH30_034007
Glyma.13G098600	0	1	-	villin-4
Glyma.13G069400	-0.580379	0.4409105374600001	-	peroxidase 31
Glyma.17G077800	0.235529	0.27453	-	protein CANDIDATE G-PROTEIN COUPLED RECEPTOR 2
Glyma.08G030200	-0.441701	0.36575218951399996	-	uncharacterized protein LOC114421122
Glyma.19G200900	-7.55252	0.695369	-	uncharacterized protein At5g39865
Glyma.08G246600	-1.20345	0.0109948842729	-	hypothetical protein GYH30_022293
Glyma.15G207000	0	1	-	hypothetical protein JHK87_042982
Glyma.18G109500	0.8677076091789999	0.0914278984963	-	disease resistance RPP13-like protein 4
Glyma.18G039700	0.32735758209800003	0.380987	-	protein C2-DOMAIN ABA-RELATED 1 isoform X1
Glyma.18G235800	-0.589441	0.20395868332000003	-	guanine nucleotide exchange factor subunit RIC1
Glyma.11G144000	-3.74994	0.28068997581300004	-	dirigent protein 10
Glyma.15G000500	-0.316834	0.8710079450689999	-	hypothetical protein JHK85_041644
Glyma.11G012000	0.6537745395100001	0.08576114451960001	-	uncharacterized protein LOC114376035 isoform X3
Glyma.13G306000	-2.0852	0.171954	-	uncharacterized protein LOC100778878
Glyma.08G059600	-0.103143	0.8977950073109999	-	uncharacterized protein LOC100809062
Glyma.04G156200	-1.46023	0.107347	-	protein TSS
Glyma.15G080200	-1.08147	0.0695210731405	-	magnesium-chelatase subunit ChlI, chloroplastic
Glyma.06G181400	0.0519927952476	0.723141	-	hypothetical protein JHK86_015646
Glyma.06G125800	-3.11992	2.79774450397e-06	down	hypothetical protein GLYMA_06G125800v4
Glyma.05G026600	-0.699953	0.044231446854999995	-	Protein EMBRYO DEFECTIVE 514-like
Glyma.06G031600	-7.19275	0.683558	-	long-chain-fatty-acid--AMP ligase FadD26
Glyma.07G126000	-2.47914	0.0212836280662	-	leucine-rich repeat extensin-like protein 6
Glyma.19G005200	-2.02552	0.00383042505672	down	denticleless protein homolog
Glyma.12G223200	-0.0380995	0.8447385589740001	-	choline transporter protein 1
Glyma.13G242100	1.5275952930599999	0.0440998021089	-	stem-specific protein TSJT1
Glyma.20G202900	-0.878647	0.0128852034628	-	uncharacterized protein LOC100526950 precursor
Glyma.02G086400	0	1	-	homeobox protein knotted-1-like 12
Glyma.06G170366	-2.59518	0.121799	-	hypothetical protein GLYMA_06G170366v4
Glyma.06G259900	-7.52259	0.695369	-	NAD(P)H dehydrogenase (quinone) FQR1-like
Glyma.12G071300	1.68194	0.000195205698203	up	E3 SUMO-protein ligase SIZ1 isoform X1
Glyma.10G170800	-0.306623	0.960367	-	zinc finger CCCH domain-containing protein ZFN-like
Glyma.07G098600	0	1	-	hypothetical protein GLYMA_07G098600v4
Glyma.13G225700	0.292611	0.202419	-	heat stress transcription factor 29
Glyma.20G191751	-1.98604	0.0101181179133	-	hypothetical protein D0Y65_054572, partial
Glyma.11G049100	3.4208	0.012329746167699999	-	hypothetical protein JHK87_029988
Glyma.05G061900	0	1	-	transcription factor MYB114
Glyma.12G107200	0	1	-	QWRF motif-containing protein 3
Glyma.04G005300	-0.268225	0.806334	-	peptidyl-prolyl cis-trans isomerase 1-like
Glyma.13G373000	-0.00850147	0.96213	-	hypothetical protein GLYMA_13G373000v4
Glyma.14G162900	1.54813	0.0029104363468099997	up	hypothetical protein JHK82_040196
Glyma.11G190400	-0.0650986	0.9269421319650001	-	hypothetical protein GLYMA_11G190400v4
Glyma.12G162936	0	1	-	hypothetical protein GLYMA_12G162936v4
Glyma.14G015500	-1.19764	0.3465722427699999	-	hypothetical protein JHK82_038535
Glyma.04G161200	0.36763681619099997	0.410277	-	hypothetical protein GYH30_010127
Glyma.02G122800	1.2139381433399998	0.08842245629349998	-	uncharacterized protein LOC114370958
Glyma.08G210000	-0.107796	0.877314	-	WD repeat-containing protein 43 isoform X4
Glyma.18G212100	-0.50071	0.646323	-	hypothetical protein GLYMA_18G212100v4
Glyma.17G010500	-0.329473	0.588519	-	calcium permeable stress-gated cation channel 1
Glyma.16G191500	-3.70669	0.424064	-	hypothetical protein GLYMA_16G191500v4
Glyma.15G158100	1.1863176194299998	0.00016648133388	up	protein GAMETE CELL DEFECTIVE 1, mitochondrial
Glyma.10G146200	0.10199523781400001	0.41125251249899997	-	hypothetical protein GLYMA_10G146200v4
Glyma.09G057700	0.382204	0.12842	-	U3 small nucleolar RNA-associated protein 25
Glyma.07G082900	-0.0361497	0.773793	-	uncharacterized protein LOC100779255
Glyma.18G166500	2.7156166697799997	0.0260819893803	-	hypothetical protein GYH30_050194
Glyma.08G189900	-0.303587	0.5720121725399999	-	telomere repeat-binding factor 4-like isoform X1
Glyma.04G081400	-1.97776	0.0025156097195900002	down	uncharacterized protein LOC100807180
Glyma.16G163300	-0.606332	0.8781575152600001	-	hypothetical protein GYH30_045277
Glyma.04G190000	1.36589	0.00212389700381	up	probable galactinol--sucrose galactosyltransferase 2
Glyma.06G121800	0.190099	0.994078	-	hypothetical protein JHK85_015446
Glyma.02G272800	-0.695423	0.21022	-	BTB/POZ and MATH domain-containing protein 4
Glyma.15G187800	0.0777768995652	0.5952358409690001	-	hypothetical protein GLYMA_15G187800v4
Glyma.01G037800	-1.70791	0.222584	-	germin-like protein 5 precursor
Glyma.01G109500	1.136	0.0400414455537	-	SOUL heme-binding domain-containing protein
Glyma.01G061200	0	1	-	hypothetical protein JHK87_000617
Glyma.01G184400	0.08468481824989998	0.6329203212650001	-	uncharacterized protein LOC100787318
Glyma.06G208900	0.152768	0.611904	-	putative phospholipid-transporting ATPase 9 isoform X2
Glyma.16G214613	0.40687475068400003	0.10918921297499999	-	protein BOLA1, chloroplastic
Glyma.18G005200	1.22532	0.021866489990099998	-	uncharacterized protein LOC100306350
Glyma.04G015900	-0.239208	0.796017	-	Glyceraldehyde-3-phosphate dehydrogenase B, chloroplastic-like
Glyma.03G057900	0	1	-	LOW QUALITY PROTEIN: hypothetical protein GLYMA_03G057900v4
Glyma.08G288700	-0.0859618	0.793384	-	GPN-loop GTPase 3
Glyma.04G215600	-1.82739	0.0092688919983	-	RING-H2 finger protein ATL78-like
Glyma.20G246300	-5.05059	0.0115787842952	-	-
Glyma.02G024500	-0.770309	0.230188	-	hypothetical protein GLYMA_02G024500v4
Glyma.10G256200	-0.588676	0.422924	-	cyclin-D4-1
Glyma.01G103400	0	1	-	hypothetical protein JHK85_001248
Glyma.16G105350	-5.95366	0.18928370783300003	-	hypothetical protein GLYMA_16G105350v4
Glyma.13G065800	0	1	-	uncharacterized protein LOC100775673
Glyma.02G258100	-1.23646	0.0674289648438	-	anaphase-promoting complex subunit 1 isoform X3
Glyma.04G013600	0	1	-	uncharacterized protein LOC102670193
Glyma.16G026400	-1.99113	0.0105433	-	WRKY transcription factor 60
Glyma.14G081300	-6.1358	0.00047748501148800004	down	patatin-like protein 2
Glyma.06G083000	-0.867644	0.2581	-	putative hydrolase YtaP isoform X1
Glyma.20G102500	-0.341801	0.640305	-	F-box/LRR-repeat protein 2
Glyma.08G231900	-0.927176	0.0399536942135	-	uncharacterized protein LOC100791001 isoform X2
Glyma.06G284200	-0.563999	0.310954	-	pentatricopeptide repeat-containing protein At3g58590
Glyma.08G208433	0.0677377832147	0.9939653448450001	-	hypothetical protein GLYMA_08G208433v4
Glyma.03G167400	-0.865978	0.8154774459090001	-	auxin-responsive protein IAA10-like isoform X2
Glyma.01G101266	0	1	-	hypothetical protein GLYMA_01G101266v4
Glyma.16G161700	-8.6271	0.5197130358690001	-	F-box protein At1g30790
Glyma.14G025400	-0.593805	0.414541	-	uncharacterized protein LOC100809375
Glyma.14G218700	-0.136949	0.86967	-	uncharacterized protein LOC100782665
Glyma.15G076200	7.550413323989999	0.554675	-	hypothetical protein JHK87_041622
Glyma.08G281450	0	1	-	hypothetical protein GLYMA_08G281450v4
Glyma.09G161100	1.7802925961900002	0.00294500919172	up	receptor-like protein kinase HSL1
Glyma.02G223300	-0.332037	0.534883	-	uncharacterized protein LOC100786274
Glyma.07G200500	4.00649	2.98025843546e-05	up	17.5 kDa class I heat shock
Glyma.03G149200	-5.2501	2.0716432797e-07	down	sugar transporter ERD6-like 7
Glyma.17G203200	-2.70825	0.00041686381609400006	down	hypothetical protein GYH30_047903
Glyma.19G138301	-0.389992	0.863914	-	putative disease resistance RPP13-like protein 1
Glyma.15G046600	-0.128701	0.974021	-	uncharacterized protein At1g10890
Glyma.05G118100	-0.0314995	0.700631	-	uncharacterized protein LOC100806318
Glyma.06G010300	0.161353	0.876774	-	hypothetical protein GYH30_013723
Glyma.19G132900	1.9047088068400002	0.000614382987505	up	triacylglycerol lipase SDP1
Glyma.08G217800	-3.06938	0.122403	-	sister chromatid cohesion protein PDS5 homolog
Glyma.06G082400	0.27926122596299996	0.157344	-	aspartate aminotransferase glyoxysomal isozyme AAT1 precursor
Glyma.14G013200	12.6364	0.189241	-	hypothetical protein JHK87_038466
Glyma.04G061100	-1.36188	0.206023	-	chorismate mutase 2 isoform X1
Glyma.09G007700	0.459145	0.0656407450558	-	probable splicing factor 3A subunit 1
Glyma.12G000800	-0.639919	0.170508	-	putative L18p/L5e ribosomal protein
Glyma.10G197500	1.3174	0.0116859881446	-	NAC domain containing protein 50
Glyma.20G189200	0.682833	0.0421784440427	-	protein PSK SIMULATOR 3
Glyma.10G191650	-7.79275	0.716587	-	hypothetical protein GLYMA_10G191650v4
Glyma.04G050150	0	1	-	hypothetical protein GYH30_008977
Glyma.01G235100	0	1	-	non-specific lipid transfer protein GPI-anchored 25
Glyma.15G205800	5.995559892819999	0.7582899692849999	-	hypothetical protein GLYMA_15G205800v4
Glyma.13G290600	-11.6445	0.0558346919984	-	Light-dependent Short Hypocotyls10-like protein
Glyma.11G220900	-2.41199	0.00284271304868	down	hypothetical protein GLYMA_11G220900v4
Glyma.16G148800	-2.07544	0.36918973814000006	-	potassium transporter 4
Glyma.08G343300	1.0791095898799998	0.00191437721487	up	poly(A)-specific ribonuclease PARN-like
Glyma.13G152848	-0.00216967	0.927704	-	uncharacterized protein LOC114380952
Glyma.11G251200	8.015563728270001	0.5987223871790001	-	uncharacterized protein LOC100788973
Glyma.03G126700	0	1	-	F-box protein At2g26850 isoform X1
Glyma.06G221600	-0.0795234	0.9851419023469999	-	reticulon-like protein B21 isoform X1
Glyma.02G273600	-10.1767	0.11380280158299999	-	hyccin
Glyma.20G137802	-0.688663	0.46738456615699997	-	hypothetical protein GLYMA_20G137802v4
Glyma.08G084600	-1.07127	0.0180372946802	-	uncharacterized protein LOC100812074
Glyma.01G122400	0	1	-	hypothetical protein JHK85_001544
Glyma.04G175100	0.38093245190700004	0.238549	-	hypothetical protein GLYMA_04G175100v4
Glyma.01G127400	-2.2446	0.0385323154772	-	dirigent family protein precursor
Glyma.09G245800	-2.44236	0.0262032288495	-	AT-hook motif nuclear-localized protein 23
Glyma.10G256500	0.744633	0.105663	-	hypothetical protein JHK85_029874
Glyma.11G226600	-2.95965	0.00484728261221	down	L10-interacting MYB domain-containing protein
Glyma.02G048700	-4.89125	1.19703095172e-07	down	chromatin-remodeling ATPase INO80
Glyma.04G182300	-1.28123	0.050217546892999995	-	polygalacturonase-1 non-catalytic subunit beta
Glyma.07G013600	-0.808027	0.48105021355899996	-	transcription factor bHLH87
Glyma.20G066200	-7.93151	0.683558	-	hypothetical protein GLYMA_20G066200v4
Glyma.18G020000	-0.982431	0.0160473665107	-	rRNA 2'-O-methyltransferase fibrillarin 2
Glyma.10G078100	0	1	-	hypothetical protein JHK87_027140
Glyma.10G093900	0.0477984041031	0.515507	-	uncharacterized protein LOC100811405
Glyma.19G173200	-0.320447	0.545761	-	RNA recognition motif-containing protein
Glyma.09G168300	0.715894	0.18942027400199998	-	beta-amylase 1, chloroplastic
Glyma.08G348300	-1.87157	0.00654891948198	down	ethylene-responsive transcription factor-like protein At4g13040 isoform
Glyma.16G098100	-0.871915	0.101344	-	leucine aminopeptidase 2, chloroplastic
Glyma.U011002	1.6292715756099998	0.00487698353754	up	hypothetical protein GLYMA_U011002v4
Glyma.13G062900	-1.72301	0.00037140078014	down	zinc-finger homeodomain protein 9
Glyma.03G091100	0.266294	0.47678401909900003	-	uncharacterized protein LOC100800765
Glyma.07G113301	0	1	-	hypothetical protein GLYMA_07G113301v4
Glyma.01G181200	-0.920861	0.00850184660192	-	NASP-related protein sim3
Glyma.01G000900	-0.875964	0.09430882814899999	-	hypothetical protein GLYMA_01G000900v4
Glyma.17G029700	-4.04221	0.00184660955287	down	probable polygalacturonase
Glyma.14G128500	-1.65049	0.213103	-	hypothetical protein GLYMA_14G128500v4
Glyma.02G202400	0.583357	0.0538708247571	-	replication termination factor 2
Glyma.18G224500	8.17631	0.627702	-	SOC1
Glyma.07G224600	-0.404416	0.41408079376999996	-	glucosidase 2 subunit beta
Glyma.07G128700	-2.12334	0.04587516666230001	-	protein EFFECTOR OF TRANSCRIPTION 2
Glyma.13G355700	-3.83459	0.0020451236006400002	down	dehydration-responsive element-binding protein 3
Glyma.20G113500	-0.369813	0.5712281442399999	-	CTL-like protein DDB_G0274487
Glyma.12G101500	-0.896522	0.08639639659980002	-	uncharacterized protein LOC100813277
Glyma.14G207100	-0.618347	0.28608	-	hypothetical protein JHK86_040223
Glyma.07G176000	20.7201	3.1500236902400002e-18	up	glycine-rich RNA-binding, abscisic acid-inducible protein
Glyma.20G130200	-0.279597	0.7928869828919999	-	transcription factor bHLH113 isoform X4
Glyma.08G344800	-0.593582	0.227241	-	abasic site processing protein YoqW
Glyma.14G039600	0.5416843837340001	0.11955784713300001	-	pentatricopeptide repeat-containing protein At1g71210, mitochondrial
Glyma.10G090400	0.27797744424000004	0.35716426263499995	-	uncharacterized protein LOC100788962
Glyma.08G267400	1.61612	0.00380741931439	up	ubiquitin-conjugating enzyme E2-17 kDa-like
Glyma.12G028300	-0.729883	0.404692	-	hypothetical protein GLYMA_12G028300v4
Glyma.14G016100	0.533606	0.576366	-	hypothetical protein GYH30_038733
Glyma.07G012600	0.746105	0.0187364601694	-	uncharacterized protein LOC100813322
Glyma.14G078400	2.4939882276099996	0.12237152556500001	-	exocyst complex component SEC3A isoform X1
Glyma.20G108600	-1.06879	0.277702	-	hypothetical protein JHK86_055909
Glyma.01G143500	-0.362274	0.886507	-	heat stress transcription factor B-2a
Glyma.15G027300	-0.0118578	0.582371	-	PHD finger superfamily protein isoform 1
Glyma.16G029800	-8.79048	0.515729	-	unknown
Glyma.02G038000	-0.231925	0.860028	-	ribose-phosphate pyrophosphokinase 4 isoform X1
Glyma.08G330500	0	1	-	hypothetical protein GLYMA_08G330500v4
Glyma.08G354800	-0.286688	0.609564	-	DMT superfamily protein
Glyma.04G155800	0.19646212538600002	0.335163	-	pentatricopeptide repeat-containing protein At4g30825, chloroplastic
Glyma.14G016800	-3.67263	7.41351845844e-05	down	kinesin-like protein KIN-12F isoform X1
Glyma.10G286102	0.928784	0.319953	-	hypothetical protein GLYMA_10G286102v4
Glyma.03G088800	-0.11751	0.8876862101340001	-	serine/threonine-protein kinase OXI1
Glyma.18G201300	-2.21585	0.0033569783652800003	down	GDSL esterase/lipase CPRD49-like
Glyma.07G119600	0	1	-	hypothetical protein GLYMA_07G119600v4
Glyma.16G014900	-9.54597	0.394737	-	hypothetical protein GYH30_043824
Glyma.13G351900	-0.264812	0.8904241292689999	-	uncharacterized protein LOC100791332
Glyma.05G179500	0.289337	0.785948	-	protein SCO1 homolog 2, mitochondrial isoform
Glyma.08G028800	-1.57333	0.14371621350400002	-	Phospholipase A2-alpha-like
Glyma.10G211751	0.812032	0.32945	-	hypothetical protein GLYMA_10G211751v4
Glyma.06G229800	0	1	-	hypothetical protein GLYMA_06G229800v4
Glyma.19G072900	-1.29224	0.00928126797034	-	protein PIN-LIKES 2
Glyma.05G212600	-1.05707	0.37056	-	uncharacterized protein LOC100781009
Glyma.19G087600	-0.46883	0.380431	-	protoporphyrinogen IX oxidase
Glyma.14G111800	-0.00194634	0.647436	-	aspartate aminotransferase P2, mitochondrial
Glyma.08G338200	-0.565463	0.408487	-	hydroquinone glucosyltransferase
Glyma.17G020100	1.61437	0.135208	-	probable galacturonosyltransferase-like 4
Glyma.20G145600	-0.129191	0.965367	-	uncharacterized protein LOC100527065
Glyma.05G225400	-1.98568	0.00954581973147	-	uncharacterized protein LOC100785838
Glyma.10G194900	-1.02631	0.270967	-	uncharacterized protein LOC100816062
Glyma.09G057400	-1.32735	0.0027186989483	down	villin-4
Glyma.11G202100	-0.825775	0.1267	-	uncharacterized protein LOC100780614 isoform X1
Glyma.06G173067	1.0135	0.17467708003899998	-	hypothetical protein GLYMA_06G173067v4
Glyma.02G279500	1.0692304145799998	0.00436120539336	up	hypothetical protein GLYMA_02G279500v4
Glyma.20G136600	1.0218320382600001	0.649124	-	agamous-like MADS-box protein AGL62
Glyma.09G210400	1.21857	0.0963264849243	-	hypothetical protein GLYMA_09G210400v4
Glyma.04G042400	-2.20444	0.0007285841351869999	down	putative receptor protein kinase ZmPK1
Glyma.17G220600	-0.207997	0.8358438414730001	-	F-box only protein 13-like
Glyma.09G285700	0.422253	0.143781	-	uncharacterized protein LOC100806152
Glyma.08G228650	9.77266	0.554675	-	hypothetical protein GLYMA_08G228650v4
Glyma.13G131400	1.1188154116700002	0.00573984514746	up	short-chain dehydrogenase TIC 32 B, chloroplastic
Glyma.18G232200	0	1	-	hypothetical protein GYH30_050871, partial
Glyma.05G160500	-1.28732	0.0894418725251	-	uncharacterized protein LOC100792716
Glyma.14G062100	1.1319	0.0138132041625	-	coronatine-insensitive protein 1-like
Glyma.16G160000	0.0975862	0.83689	-	MA3 DOMAIN-CONTAINING TRANSLATION REGULATORY FACTOR 2
Glyma.06G323300	-0.699535	0.5241	-	hypothetical protein GYH30_016908
Glyma.14G009400	-2.59783	0.127569	-	protein GRAVITROPIC IN THE LIGHT 1
Glyma.10G286666	0.817105	0.0375958359373	-	hypothetical protein GLYMA_10G286666v4
Glyma.10G010700	-0.0170582	0.7276046562690001	-	gibberellin 2-beta-dioxygenase 2
Glyma.19G006400	0.8484231282770001	0.0144015489655	-	ADP-ribosylation factor
Glyma.10G232500	-1.78233	0.0356299558246	-	uncharacterized protein LOC100798631 isoform X1
Glyma.18G057500	-0.251298	0.8286526448579999	-	probable protein phosphatase 2C 26 isoform
Glyma.13G256400	-0.192405	0.6671260481719999	-	hypothetical protein GLYMA_13G256400v4
Glyma.15G138132	0	1	-	hypothetical protein GLYMA_15G138132v4
Glyma.10G255100	-0.183946	0.972533	-	pyruvate kinase isozyme A, chloroplastic
Glyma.02G120300	-1.33528	0.0175404690301	-	fructokinase-like 2, chloroplastic
Glyma.11G062100	-0.0672838	0.899571	-	histone-lysine N-methyltransferase SUVR5
Glyma.18G065500	0	1	-	hypothetical protein GLYMA_18G065500v4
Glyma.11G224266	1.29813	0.0730126	-	hypothetical protein GLYMA_11G224266v4
Glyma.14G154300	-1.26707	0.393073	-	hypothetical protein GYH30_040082
Glyma.15G209200	-8.67763	0.515729	-	hypothetical protein GLYMA_15G209200v4
Glyma.08G261450	-0.0837608	0.885785	-	hypothetical protein GLYMA_08G261450v4
Glyma.17G073400	3.47271	0.0757621	-	early nodulin-55-2 precursor
Glyma.04G136100	0	1	-	hypothetical protein GLYMA_04G136100v4
Glyma.07G026100	-0.373209	0.6980549446100001	-	EIN3-binding F-box protein 2
Glyma.14G030400	2.01491	0.00026727041198500005	up	4-hydroxyphenylpyruvate dioxygenase long isoform, chloroplastic isoform
Glyma.01G009200	-1.90569	0.00558137377815	down	lachrymatory-factor synthase
Glyma.15G059000	-0.400604	0.649951	-	pentatricopeptide repeat-containing protein At4g31070, mitochondrial
Glyma.12G104000	-1.7695	0.0021507344227399998	down	5' exonuclease Apollo
Glyma.04G147700	0.5593970376749999	0.023880468683000002	-	heme oxygenase 1, chloroplastic
Glyma.03G032700	-2.84483	0.025819005157599998	-	glycosyltransferase superfamily protein
Glyma.08G173500	0.777014	0.0294100534092	-	DExH-box ATP-dependent RNA helicase DExH12
Glyma.07G070800	0.22904084521499998	0.26290665612799996	-	protein KTI12 homolog
Glyma.02G297700	-1.13167	0.142897	-	scarecrow-like protein 21
Glyma.09G169400	0.184247	0.35276051074000003	-	transmembrane 9 superfamily member 3-like
Glyma.19G227100	0	1	-	importin subunit alpha-4 isoform X1
Glyma.12G056800	2.23272	0.00281012055407	up	cytochrome c-type biogenesis protein CcmE homolog,
Glyma.03G106500	0.0201937499617	0.516882	-	eukaryotic translation initiation factor 4G isoform
Glyma.09G041750	-0.901738	0.559161	-	hypothetical protein GLYMA_09G041750v4
Glyma.07G237500	-2.27588	0.055415899869300005	-	cell wall / vacuolar inhibitor of
Glyma.10G127400	-0.0239531	0.7225170758730001	-	hydroxyethylthiazole kinase isoform X2
Glyma.07G057300	-2.43101	0.000803567969244	down	hypothetical protein GYH30_017526
Glyma.07G218500	-7.89567	0.504614	-	hypothetical protein GYH30_019189
Glyma.15G266800	-0.963809	0.629124	-	serine/threonine-protein kinase RHS3
Glyma.14G190800	-1.80765	4.64139024752e-05	down	histone H4
Glyma.14G192600	0	1	-	transcription factor MYB64
Glyma.20G203200	-0.065733	0.911583	-	electron transfer flavoprotein subunit beta, mitochondrial
Glyma.06G181300	7.83308	0.554675	-	F-box/kelch-repeat protein At3g23880
Glyma.13G270200	0.0142746306357	0.514251	-	hypothetical protein GLYMA_13G270200v4
Glyma.14G012200	0.51507	0.0668475438385	-	GBF-interacting protein 1-like isoform X1
Glyma.16G116932	8.2834	0.627702	-	uncharacterized protein LOC100815119
Glyma.11G239000	2.93594	0.0038930746052100004	up	putative ETHYLENE INSENSITIVE 3-like 4 protein
Glyma.06G042900	-2.14698	0.0180048878616	-	cyclin-D3-3
Glyma.19G237400	0	1	-	hypothetical protein GLYMA_19G237400v4
Glyma.07G193100	0	1	-	Uncharacterized protein GmHk_07G020135
Glyma.16G046900	-0.937775	0.0464490229533	-	Histidine biosynthesis bifunctional protein hisIE, chloroplastic
Glyma.08G266300	0.402263	0.08061297953260001	-	dual specificity protein kinase YAK1 homolog
Glyma.06G053600	-0.69015	0.351222	-	uncharacterized protein At4g33100
Glyma.03G203800	-0.325707	0.622487	-	Dihydroneopterin aldolase 2-like
Glyma.10G080152	0	1	-	uncharacterized protein LOC102663022
Glyma.02G059600	-2.21736	0.0297106505032	-	putative calcium-binding protein
Glyma.13G164200	9.787810075980001	0.37306656427699997	-	hypothetical protein GYH30_036432
Glyma.01G207000	-1.00869	0.07828164868410001	-	DeSI-like protein At4g17486-like
Glyma.04G210200	0.328223	0.137037	-	vacuolar protein sorting-associated protein 20 homolog
Glyma.02G284100	-0.176508	0.948814	-	TMV resistance protein N
Glyma.08G335900	0.571832	0.09828332988630001	-	nuclear transcription factor Y subunit A-1
Glyma.16G157500	-1.59971	0.38481773727799995	-	G-type lectin S-receptor-like serine/threonine-protein kinase
Glyma.08G234200	-0.631311	0.424824	-	E3 ubiquitin-protein ligase RGLG4 isoform X1
Glyma.11G022200	1.7239139234999998	0.114225	-	homeobox protein BEL1 homolog
Glyma.01G187600	-0.69854	0.254995	-	transcription factor SPATULA
Glyma.06G190400	-9.93633	0.21638026940699998	-	mitochondrial outer membrane protein porin 1
Glyma.13G303600	0.216949	0.269848	-	universal stress protein PHOS34-like isoform X1
Glyma.12G228751	0	1	-	hypothetical protein GLYMA_12G228751v4
Glyma.09G217900	-2.11014	0.08140740084860001	-	uncharacterized protein LOC100527423
Glyma.02G180000	0	1	-	hypothetical protein JHK85_004761
Glyma.15G249700	-0.0858204	0.972127	-	cullin-4
Glyma.20G070200	1.7467	2.7938593005e-05	up	putative lipase ROG1
Glyma.04G049500	-1.73389	0.0318415351714	-	homeobox protein knotted-1-like 2 isoform X1
Glyma.14G206200	-11.8273	7.53746077452e-06	down	probable LRR receptor-like serine/threonine-protein kinase At1g06840-like
Glyma.15G148500	-1.5671	0.0130113096689	-	ABC transporter C family member 14
Glyma.06G256500	0	1	-	hypothetical protein GYH30_016274, partial
Glyma.01G199700	-1.38851	0.127563	-	Glycine cleavage system H protein, mitochondrial-like
Glyma.09G024900	-1.64612	0.00150532386355	down	LRR receptor-like serine/threonine-protein kinase GHR1
Glyma.10G094500	-0.0638497	0.9122964853910001	-	serine/threonine-protein kinase Nek7 isoform X1
Glyma.14G112200	0.146737	0.419989	-	trafficking protein particle complex II-specific subunit
Glyma.04G218800	0.2142	0.23151911257399999	-	programmed cell death protein 2-like
Glyma.12G240400	0.30433033879500004	0.20371272553800002	-	protein EMSY-LIKE 3
Glyma.20G113600	-0.1402	0.9128092092710001	-	transcription factor TGA2.3
Glyma.13G221300	-0.0252011	0.849465	-	protein PLASTID TRANSCRIPTIONALLY ACTIVE 12, chloroplastic
Glyma.16G083300	-1.80759	0.0033550954889699997	down	protein PEP-RELATED DEVELOPMENT ARRESTED 1, chloroplastic
Glyma.09G230100	2.48607	0.348225	-	hypothetical protein JHK85_026556
Glyma.08G200400	0.36481894636699996	0.275156	-	protein IQ-DOMAIN 14
Glyma.17G124000	0.36488165458000005	0.624278	-	hypothetical protein JHK85_047787
Glyma.19G103200	-0.194737	0.781091	-	alpha-mannosidase At3g26720
Glyma.08G304900	0	1	-	non-specific lipid-transfer protein AP10-like
Glyma.11G038700	-0.91623	0.0416910985169	-	peptidyl-prolyl cis-trans isomerase CYP32
Glyma.06G006500	0	1	-	auxin-responsive family protein
Glyma.15G042500	-2.39178	0.0649938747627	-	3-ketoacyl-CoA synthase 12
Glyma.02G014400	-2.83791	0.159003	-	uncharacterized protein LOC100800206
Glyma.07G118900	-2.56478	0.139643	-	uncharacterized protein At1g28695
Glyma.05G088800	0.343546	0.270917	-	hypothetical protein GLYMA_05G088800v4
Glyma.09G254500	0.956089	0.172621	-	sphingoid long-chain bases kinase 2, mitochondrial
Glyma.11G111400	-1.89726	0.018150403088499998	-	fructose-bisphosphate aldolase 1, chloroplastic
Glyma.20G131700	-0.106848	0.948453	-	uncharacterized protein LOC100815216 isoform X2
Glyma.15G166200	0.611305	0.133004	-	pathogenesis-related homeodomain protein isoform X3
Glyma.03G199000	-3.46003	0.0006982317708200001	down	B3 domain-containing protein At2g36080
Glyma.20G137000	-0.605593	0.44719201689300003	-	probable xyloglucan endotransglucosylase/hydrolase protein 10
Glyma.18G244900	-1.25636	0.0202369284905	-	phosphoglycolate phosphatase 1A, chloroplastic isoform X1
Glyma.06G222000	-0.769546	0.152665	-	protein BUNDLE SHEATH DEFECTIVE 2, chloroplastic
Glyma.19G092700	-2.29756	0.0377279425971	-	uncharacterized protein LOC114399697
Glyma.09G233700	-9.05477	0.390147	-	probable beta-1,3-galactosyltransferase 8 isoform X2
Glyma.10G197400	2.54612	0.00020598665988599997	up	ras-related protein RABC2a-like
Glyma.08G166300	-2.01338	0.318977	-	hypothetical protein JHK87_021492
Glyma.04G036340	-0.248134	0.832062	-	hypothetical protein GLYMA_04G036340v4
Glyma.17G233400	0	1	-	hypothetical protein JHK86_048507
Glyma.10G119100	0.23524	0.642834	-	DNA-binding domain-containing protein
Glyma.20G137900	0.127498	0.596417	-	putative receptor-like protein kinase At4g00960
Glyma.01G114800	-1.10634	0.0562845353747	-	30S ribosomal protein S31, chloroplastic
Glyma.17G249700	-10.6926	0.027183647436199998	-	uncharacterized protein LOC100812649
Glyma.10G297501	9.812016818830001	0.554675	-	hypothetical protein GLYMA_10G297501v4
Glyma.13G326000	-1.85047	0.043597155367099995	-	hypothetical protein GmHk_13G039246
Glyma.13G123700	0.255211	0.325169	-	structural maintenance of chromosomes protein 1
Glyma.13G363400	-0.934991	0.0645326140195	-	lys-63-specific deubiquitinase BRCC36
Glyma.03G087001	0	1	-	hypothetical protein GLYMA_03G087100v4
Glyma.11G161320	10.7831	0.477091	-	hypothetical protein GLYMA_11G161320v4
Glyma.08G351700	-0.527726	0.165882	-	unknown
Glyma.13G216800	-0.366586	0.497386	-	GTP-binding protein OBGC, chloroplastic
Glyma.10G168300	-0.846649	0.32131737483600004	-	hypothetical protein GLYMA_10G168300v4
Glyma.06G045100	1.63007	1	-	subtilisin-like protease SBT1.7
Glyma.01G042300	1.0968046427399998	0.00802892389863	up	proteolipid protein 2 isoform X1
Glyma.20G077800	0	1	-	hypothetical protein GLYMA_20G077800v4
Glyma.15G140501	0	1	-	hypothetical protein GLYMA_15G140501v4
Glyma.11G193150	-1.03952	0.210594	-	hypothetical protein GLYMA_11G193150v4
Glyma.18G027200	-1.4254	0.0341240110171	-	hypothetical protein GLYMA_18G027200v4
Glyma.06G121500	0.8480917421080001	0.0172623	-	transcriptional corepressor SEUSS isoform X2
Glyma.16G047900	0.671369	0.0253087393566	-	hypothetical protein JHK86_044418
Glyma.06G290400	1.01288	0.00683723840782	up	putative E3 ubiquitin-protein ligase RING1a isoform
Glyma.06G071800	1.68622	0.0296731495448	-	pleiotropic drug resistance protein 1
Glyma.12G091200	-2.05399	0.025985881593499998	-	NAC domain-containing protein 90 isoform X1
Glyma.05G069532	0	1	-	hypothetical protein GLYMA_05G069532v4
Glyma.08G114900	0.7793856522589999	0.0165494211887	-	hypothetical protein GLYMA_08G114900v4
Glyma.18G232100	0	1	-	hypothetical protein GYH30_050870
Glyma.18G295900	1.4525310390600001	0.033512032708900005	-	uncharacterized protein LOC100813565
Glyma.07G258000	-0.219968	0.781163	-	NEDD8-activating enzyme E1 catalytic subunit isoform
Glyma.03G109900	-1.76416	0.000913403761577	down	uclacyanin-3
Glyma.10G147500	-8.18974	0.535919	-	hypothetical protein GLYMA_10G147500v4
Glyma.16G022200	-2.03795	0.0201253012268	-	calcium-transporting ATPase, endoplasmic reticulum-type
Glyma.09G076100	0	1	-	putative pectinesterase/pectinesterase inhibitor 45
Glyma.07G226267	-0.010042	0.566748	-	hypothetical protein GLYMA_07G226267v4
Glyma.11G105700	-1.90178	0.0014286661343499998	down	uncharacterized protein LOC114376954
Glyma.11G057300	-1.19689	0.488065	-	hypothetical protein JHK87_030063
Glyma.17G115400	-1.59776	0.0032391083204099994	down	NHP2-like protein 1
Glyma.16G051500	1.20066	0.00322533877309	up	uncharacterized protein LOC100819038
Glyma.14G019600	1.69633	0.451303	-	hypothetical protein GLYMA_14G019600v4
Glyma.18G188650	-8.56266	0.8699851219760001	-	hypothetical protein GLYMA_18G188650v4
Glyma.04G117400	-0.651553	0.24600224620299999	-	mitochondrial intermediate peptidase, mitochondrial
Glyma.02G001400	2.5481003638599997	0.00017385814451299997	up	U-box domain-containing protein 44
Glyma.01G149900	0.0315790299889	0.592836	-	putative ankyrin repeat protein RF_0381
Glyma.01G026400	0.47581421330799994	0.180853	-	uncharacterized protein LOC100779659
Glyma.18G296400	-0.610148	0.25544028014000003	-	uncharacterized protein LOC100805737 isoform X2
Glyma.04G042200	-1.66632	0.135373	-	probable carbohydrate esterase At4g34215 isoform X1
Glyma.20G147900	-2.54085	0.0156840452534	-	geraniol 8-hydroxylase
Glyma.09G194700	-0.419561	0.974338	-	hypothetical protein JHK82_025623
Glyma.03G253400	-0.519023	0.350989	-	uncharacterized protein LOC100815552
Glyma.13G281900	-1.35817	0.0370548761099	-	myosin-2
Glyma.01G070150	0.527484	0.119057	-	uncharacterized protein LOC100782698
Glyma.16G126601	0	1	-	hypothetical protein GLYMA_16G126601v4
Glyma.09G048450	-15.1015	6.3952488068199995e-06	down	hypothetical protein GLYMA_09G048450v4
Glyma.15G158800	0.23787	0.185763	-	eukaryotic initiation factor 4A-3
Glyma.05G179402	8.91918	0.554675	-	hypothetical protein GLYMA_05G179402v4
Glyma.17G169400	0.0160287	0.754343	-	hypothetical protein JHK86_047662
Glyma.04G158900	0	1	-	uncharacterized protein LOC100815189
Glyma.01G127500	-0.751104	0.29057439465999996	-	patellin-6
Glyma.04G187900	3.32215	7.497661176680001e-07	up	C2 and GRAM domain-containing protein At5g50170
Glyma.04G066900	0.42288	0.32931	-	hypothetical protein JHK87_009132
Glyma.20G211500	-7.50308	0.683558	-	hypothetical protein GLYMA_20G211500v4
Glyma.13G114700	0.263964	0.22446551631900002	-	uncharacterized protein LOC100810604
Glyma.13G330300	0	1	-	uncharacterized protein LOC114374130
Glyma.13G277700	-0.0706641	0.7060903961480001	-	terminal nucleotidyltransferase 4A
Glyma.13G099150	0	1	-	hypothetical protein GLYMA_13G099150v4
Glyma.18G170800	1.68585	0.0084163098774	up	cyclin-dependent kinase inhibitor 4
Glyma.16G124800	0.0444891460434	0.489449	-	hypothetical protein JHK86_045304
Glyma.09G068600	1.05998	0.00879669571177	up	protein CTR9 homolog
Glyma.04G181600	8.759577534930001	0.554675	-	hypothetical protein GLYMA_04G181600v4
Glyma.07G248000	-0.76976	0.246263	-	hypothetical protein JHK86_019782
Glyma.01G016400	0.40605365267399995	0.223102	-	UDP-N-acetylglucosamine transferase subunit ALG14 homolog isoform
Glyma.11G196300	-0.325063	0.806204	-	BEL1-like homeodomain protein 8
Glyma.09G062900	-0.180284	0.865422	-	beta-galactosidase
Glyma.08G241650	0	1	-	hypothetical protein GLYMA_08G241650v4
Glyma.09G111000	-0.118263	0.899907	-	nudix hydrolase 23, chloroplastic isoform X2
Glyma.17G198400	0.161663	0.328719	-	uncharacterized protein LOC100803746
Glyma.08G186300	-0.297836	0.743324	-	hypothetical protein GYH30_021679
Glyma.07G083800	-0.262441	0.8904241292689999	-	hypothetical protein GLYMA_07G083800v4
Glyma.15G192700	-1.66783	0.0233638330211	-	187-kDa microtubule-associated protein AIR9
Glyma.16G081900	-8.99373	0.482663	-	hypothetical protein GLYMA_16G081900v4
Glyma.08G169701	1.02327	0.8034475339280001	-	hypothetical protein GLYMA_08G169701v4
Glyma.02G115000	-0.0986922	0.933287	-	hypothetical protein GLYMA_02G115000v4
Glyma.10G024600	-6.36583	1.57653042848e-05	down	probable glutathione peroxidase 4
Glyma.12G118700	-0.906041	0.166489	-	NAC domain-containing protein 73
Glyma.12G228700	0.24963018376600002	0.411566	-	increased DNA methylation 1
Glyma.08G161700	-0.115048	0.9284732973469999	-	non-specific lipid-transfer protein 8-like
Glyma.11G056300	-0.342981	0.898379	-	hypothetical protein GYH30_030136
Glyma.19G038000	-0.557631	0.35948	-	probable galacturonosyltransferase 9
Glyma.13G043600	-8.73329	0.42274	-	hypothetical protein JHK86_035389
Glyma.08G018900	-1.94023	0.00236803750946	down	respiratory burst oxidase homolog protein A
Glyma.08G335400	0.515933	0.039905260752500005	-	armadillo repeat-containing protein 8
Glyma.15G119600	-0.732748	0.5620897671899999	-	hydrophobic seed protein-like
Glyma.11G020700	-0.875687	0.214835	-	respiratory burst oxidase homolog protein A
Glyma.14G215600	-8.18181	0.695369	-	protein RSI-1
Glyma.19G112600	-0.287825	0.567134	-	uncharacterized protein LOC100794263 isoform X2
Glyma.06G306400	-0.634686	0.137861	-	hypothetical protein JHK82_016940
Glyma.12G013500	1.2346582256999998	0.504615	-	hypothetical protein GYH30_032374
Glyma.13G158800	0.932147	0.0122952982385	-	topless-related protein 4 isoform X2
Glyma.04G133100	-0.597833	0.261828	-	bifunctional purine biosynthesis protein PurH
Glyma.07G051600	0.806207	0.0273215328527	-	CDPK-related kinase 3
Glyma.12G177700	-1.92391	0.00220831440411	down	transcription factor RAX2
Glyma.13G255200	0.6503301965820001	0.16788893434799998	-	MADS-box transcription factor NMHC5
Glyma.03G105400	-0.144961	0.95785	-	FCS-like zinc-finger domain-containing protein
Glyma.16G007550	2.10214	0.20069918467599998	-	hypothetical protein GLYMA_16G007550v4
Glyma.19G102500	0.051831612008100006	0.512066	-	sialyltransferase-like protein 1
Glyma.07G048100	-0.700245	0.329032	-	NAC domain-containing protein 91
Glyma.06G257702	0.483553	0.198921	-	hypothetical protein GLYMA_06G257702v4
Glyma.18G031932	-9.31194	0.515729	-	hypothetical protein GLYMA_18G031932v4
Glyma.18G093200	0.15293308660399998	0.42852602769000003	-	imidazole glycerol phosphate synthase hisHF, chloroplastic
Glyma.09G137350	2.60595	0.0946636307195	-	hypothetical protein GLYMA_09G137350v4
Glyma.U031418	3.53276	0.013158276256600002	-	beta-galactosidase isoform X3
Glyma.10G058050	0	1	-	hypothetical protein GLYMA_10G058050v4
Glyma.10G235300	-1.27718	0.000676070968174	down	proteoglycan 4 isoform X2
Glyma.15G067800	1.33597	0.0103737616077	-	sphingosine kinase 1 isoform X1
Glyma.05G219000	-1.10261	0.0538506907113	-	protein KINESIN LIGHT CHAIN-RELATED 1
Glyma.04G074300	0.419744	0.0361488839771	-	hypothetical protein GLYMA_04G074300v4
Glyma.02G128700	-1.52626	0.017501357695400004	-	uncharacterized protein LOC102661207
Glyma.08G313532	3.47156	0.11948413248600001	-	hypothetical protein GLYMA_08G313532v4
Glyma.09G026900	-2.11685	0.0724456637093	-	berberine bridge enzyme-like 13
Glyma.14G022800	-0.524444	0.280571	-	mitochondrial acidic protein mam33
Glyma.11G157976	1.65832	0.00039551416470699996	up	putative pheophytinase
Glyma.05G039550	0.0807028545606	0.9689500909409999	-	hypothetical protein GLYMA_05G039550v4
Glyma.07G124400	0	1	-	feruloyl CoA ortho-hydroxylase F6H1-3
Glyma.03G254300	11.0641	0.0560216608761	-	basic endochitinase
Glyma.08G153200	0.849869	0.0373489682101	-	zinc finger A20 and AN1 domain-containing
Glyma.08G132700	1.42929	0.784867	-	hypothetical protein GYH30_021124
Glyma.14G045500	0.047102904974499996	0.483172	-	BTB/POZ and MATH domain-containing protein 4
Glyma.03G017600	0.212941	0.480331	-	protein-ribulosamine 3-kinase, chloroplastic isoform X1
Glyma.18G177900	0	1	-	hypothetical protein GLYMA_18G177900v4
Glyma.11G237100	0	1	-	hypothetical protein GYH30_032028
Glyma.13G368132	2.02749	0.0745394366222	-	hypothetical protein GLYMA_13G368132v4
Glyma.09G152500	-7.12736	0.695369	-	hypothetical protein GLYMA_09G152500v4
Glyma.04G165800	-4.50221	6.32739453512e-05	down	uncharacterized protein LOC100797246
Glyma.08G211500	-0.601198	0.167347	-	uncharacterized protein LOC100305755
Glyma.06G172150	0.985392	0.7919357210410001	-	hypothetical protein GLYMA_06G172150v4
Glyma.17G138800	-3.00587	0.00809445283823	down	adenine phosphoribosyltransferase 4 isoform X1
Glyma.01G067900	-1.41177	0.00028590765142199996	down	protein RAE1-like
Glyma.16G090900	-1.11439	0.264213	-	transcription factor bHLH91
Glyma.09G115600	-0.23386	0.9154542450550001	-	DExH-box ATP-dependent RNA helicase DExH5, mitochondrial
Glyma.17G233900	-0.257174	0.861911	-	WD repeat-containing protein PCN isoform X1
Glyma.12G097500	0.696581	0.0595249531915	-	B-cell receptor-associated protein 31-like protein
Glyma.10G282900	-0.967809	0.0330174463121	-	probable protein phosphatase 2C 64
Glyma.12G151100	0.19921508562100002	0.333297	-	calcium homeostasis endoplasmic reticulum protein
Glyma.07G046300	7.997894534119999	0.627702	-	uncharacterized protein LOC100778726
Glyma.08G025200	0.259981	0.6635529474849999	-	hypothetical protein GLYMA_08G025200v4
Glyma.08G339500	1.21953	0.07057964342680001	-	unknown
Glyma.11G038100	-1.46945	0.548609	-	hypothetical protein GYH30_029949
Glyma.13G253850	1.03975	0.311	-	hypothetical protein GLYMA_13G253850v4
Glyma.10G065900	0.821462	0.018572207305299997	-	DNA glycosylase/AP lyase ROS1 isoform X1
Glyma.04G232900	-0.88187	0.09511090477590001	-	malignant T-cell-amplified sequence 1 homolog
Glyma.15G137400	-1.70249	0.182236	-	hypothetical protein JHK86_042293
Glyma.01G116700	-3.27572	0.00035851287317199994	down	alcohol dehydrogenase-like 4
Glyma.20G036600	-0.427805	0.7465169662029999	-	uncharacterized protein LOC100820215
Glyma.14G051100	8.816525044199999	0.554675	-	hypothetical protein GYH30_039066
Glyma.03G138400	-1.13024	0.187801	-	G-type lectin S-receptor-like serine/threonine-protein kinase SD3-1
Glyma.02G124900	0	1	-	protein SRG1
Glyma.12G047200	-0.891682	0.0215249091523	-	mitochondrial import receptor subunit TOM6 homolog
Glyma.14G088300	-0.595194	0.6355891539549999	-	zinc finger protein ZAT10-like
Glyma.18G109100	0.635332	0.35400822707900004	-	putative callose synthase 6 isoform X1
Glyma.01G106700	-0.215823	0.9678	-	copper transporter 2
Glyma.08G066700	0.316283	0.196586	-	zinc finger protein 385B
Glyma.17G090100	-0.0048395	0.757691	-	CASP-like protein 4A3
Glyma.07G195500	-0.249203	0.855711	-	general transcription and DNA repair factor
Glyma.10G062700	0.499146	0.04666914011369999	-	uncharacterized protein LOC100798276
Glyma.02G240900	-1.0735	0.0455354438239	-	expansin-A13
Glyma.12G188400	0	1	-	hypothetical protein GLYMA_12G188400v4
Glyma.02G103900	-0.160605	0.945651	-	polyadenylate-binding protein 2
Glyma.09G125500	0	1	-	hypothetical protein JHK87_024849
Glyma.13G368200	0.7220675917270001	0.030879114074900002	-	hypothetical protein GLYMA_13G368200v4
Glyma.10G287700	9.412089927110001	0.024736364763700003	-	aluminum-activated malate transporter 12
Glyma.20G000600	8.10474	0.5987223871790001	-	nuclear transcription factor Y subunit B-6
Glyma.08G087800	0.17876765882399998	0.256489	-	uncharacterized protein LOC100305971
Glyma.06G078300	-0.0640866	0.9876954164280001	-	uncharacterized protein LOC100804399
Glyma.01G159450	-0.00369834	0.96213	-	uncharacterized protein LOC114405605
Glyma.01G025900	0	1	-	hypothetical protein GLYMA_01G025900v4
Glyma.12G060900	-1.20371	0.24742516036200002	-	laccase-2
Glyma.19G021001	0	1	-	hypothetical protein GLYMA_19G021001v4
Glyma.07G007000	-1.35344	0.16697318293299998	-	RecName: Full=Seed linoleate 9S-lipoxygenase; AltName: Full=Lipoxygenase
Glyma.16G023200	-0.199876	0.933176	-	protein KINESIN LIGHT CHAIN-RELATED 1
Glyma.07G067500	-1.72181	0.0104194154598	-	uncharacterized protein LOC100789583
Glyma.06G124100	-0.379032	0.5826538291059999	-	uncharacterized protein LOC100806693
Glyma.11G066200	0	1	-	hypothetical protein JHK87_030149
Glyma.13G282100	-2.4833	0.013490911534500001	-	transcription factor MYB41
Glyma.10G263251	0	1	-	hypothetical protein GLYMA_10G263251v4
Glyma.07G268700	0.371597	0.17512195658500002	-	polyphosphoinositide binding protein Ssh1p
Glyma.08G122100	-7.75738	0.683558	-	hypothetical protein JHK82_021160
Glyma.15G060900	0.10073712544399999	0.516016	-	uncharacterized protein LOC102665280
Glyma.08G043000	-0.247891	0.686063	-	hypothetical protein JHK87_020328
Glyma.18G111200	-0.509109	0.374009	-	phi class glutathione S-transferase
Glyma.11G000500	0.519491	0.08930453683039999	-	scopoletin glucosyltransferase
Glyma.19G082700	0	1	-	hypothetical protein JHK86_052812
Glyma.12G067902	0.37041	0.546748	-	yrdC domain-containing protein, mitochondrial isoform X2
Glyma.04G067600	1.44603	0.0026200478473	up	DEAD-box ATP-dependent RNA helicase 15
Glyma.09G131050	0	1	-	hypothetical protein GLYMA_09G131050v4
Glyma.10G018350	0	1	-	caffeoylshikimate esterase-like
Glyma.15G166700	0.852386	0.0438105794377	-	DNA ligase 4 isoform X2
Glyma.10G081000	0.628907	0.34670822651600003	-	hypothetical protein JHK86_027417
Glyma.02G163300	0.632001	0.0095871555205	-	CDPK-related kinase 1
Glyma.06G226451	0	1	-	hypothetical protein GLYMA_06G226451v4
Glyma.09G013800	-11.1513	0.19006	-	heavy metal-associated isoprenylated plant protein 7
Glyma.19G130600	0.52828	0.313325	-	uncharacterized protein LOC100305712
Glyma.09G186300	-0.377738	0.353006	-	hypothetical protein GLYMA_09G186300v4
Glyma.12G119000	0.38560552912199997	0.14797068877900002	-	uncharacterized protein LOC102660628
Glyma.02G238051	0	1	-	hypothetical protein GLYMA_02G238051v4
Glyma.12G105300	-0.425288	0.7264415640009999	-	hypothetical protein JHK87_033302
Glyma.19G262500	0.102721	0.458798	-	translation initiation factor eIF-2B subunit alpha
Glyma.12G117300	0	1	-	hypothetical protein GLYMA_12G117300v4
Glyma.11G095501	0.052105167174500006	0.6722927565369999	-	hypothetical protein GLYMA_11G095501v4
Glyma.19G240100	-0.963464	0.023743939078900003	-	Acyl carrier protein 1, chloroplastic-like
Glyma.08G197400	-1.60448	0.00327354691727	down	glycosyltransferase BC10
Glyma.05G044700	1.34009	0.464668	-	hypothetical protein GYH30_011563
Glyma.02G203800	0.9810611362489999	0.00706972166508	-	probable WRKY transcription factor 32
Glyma.13G305300	0	1	-	hypothetical protein GLYMA_13G305300v4
Glyma.10G154100	-6.34294	3.28672576276e-05	down	microtubule-binding protein TANGLED
Glyma.20G167500	-1.08123	0.535085	-	abscisic stress ripening-like protein
Glyma.02G036300	-1.0545	0.0402993849364	-	ATP-citrate synthase alpha chain protein 1-like
Glyma.02G106100	0.661448	0.10099790008500001	-	peroxisomal adenine nucleotide carrier 1
Glyma.02G004000	-0.905331	0.0440780042813	-	Glycolipid transfer protein 1-like
Glyma.05G058700	-0.290665	0.6191	-	vesicle-associated protein
Glyma.02G222000	0	1	-	hypothetical protein GLYMA_02G222000v4
Glyma.16G145100	-0.187593	0.985867	-	putative alpha/beta hydrolase
Glyma.11G165100	-1.34368	0.0903681548929	-	glucan endo-1,3-beta-glucosidase 9
Glyma.09G047400	0	1	-	probable purine permease 4
Glyma.05G138800	-1.06521	0.08562742359339999	-	Probable transmembrane ascorbate ferrireductase 3-like
Glyma.17G086600	-0.254814	0.776211	-	FKBP12-interacting protein of 37 kDa isoform
Glyma.13G234300	0.41184	0.0958864605006	-	hypothetical protein JHK87_037042
Glyma.13G111100	-8.13974	0.695369	-	hypothetical protein GYH30_035832
Glyma.20G151100	0.0189823973304	0.620534	-	AUGMIN subunit 2
Glyma.15G005232	0	1	-	hypothetical protein GLYMA_15G005232v4
Glyma.05G172800	-1.32914	0.017685010749299998	-	uncharacterized protein LOC100781005
Glyma.10G227000	0	1	-	hypothetical protein JHK87_028857
Glyma.18G060250	0	1	-	keratin-associated protein 6-2-like
Glyma.17G192300	-0.33219	0.660735	-	hypothetical protein GLYMA_17G192300v4
Glyma.17G085500	3.0331465866400005	0.191494	-	hypothetical protein GLYMA_17G085500v4
Glyma.07G270100	-0.119613	0.990428	-	snRNA-activating protein complex subunit isoform X5
Glyma.17G237600	-3.15041	0.024150817726099998	-	hypothetical protein JHK86_048553
Glyma.19G022100	0.450259	0.312096	-	myb-related protein 306
Glyma.02G305700	0.49595145838699994	0.07542539568989999	-	OBERON-like protein
Glyma.01G064100	0	1	-	agamous-like MADS-box protein MADS2 isoform X2
Glyma.02G183302	0	1	-	hypothetical protein GLYMA_02G183302v4
Glyma.08G230100	-1.6946	0.07841858435169999	-	SRPBCC domain-containing protein
Glyma.06G198100	-1.37456	0.152919	-	flavin-containing monooxygenase FMO GS-OX-like 9
Glyma.08G097700	0.6871751050470001	0.0576027375708	-	KH domain-containing protein At4g18375
Glyma.07G181500	0.451955	0.164327	-	uncharacterized protein LOC100811866
Glyma.06G029200	0.348659	0.604078	-	BEL1-like homeodomain protein 11
Glyma.13G184500	1.2792	0.04844573926990001	-	uncharacterized protein LOC100804023 isoform X1
Glyma.12G189666	1.13317	0.69109	-	hypothetical protein GLYMA_12G189666v4
Glyma.06G019000	3.4807536946399997	0.0011043882272100001	up	hypothetical protein GYH30_013813
Glyma.15G087000	-1.269	0.22802395178800003	-	hypothetical protein GYH30_041775
Glyma.09G247800	-0.207401	0.903319	-	hypothetical protein JHK87_026048
Glyma.17G197401	10.8146	0.245362	-	hypothetical protein GLYMA_17G197401v4
Glyma.20G243900	1.3970629104299999	0.00400335435794	up	-
Glyma.15G228400	-2.25633	0.522429	-	hypothetical protein JHK87_043292
Glyma.09G062101	3.7893689670699997	0.017703448880900002	-	hypothetical protein GLYMA_09G062101v4
Glyma.16G025800	0.629902	0.0277798387121	-	hypothetical protein GLYMA_16G025800v4
Glyma.13G024900	0	1	-	hypothetical protein GYH30_034910
Glyma.09G023800	0.12163070373500001	0.521737	-	nuclear transcription factor Y subunit A-8
Glyma.08G340800	1.22558	0.0012536993915	up	phosphatidylinositol 4-phosphate 5-kinase 5 isoform X1
Glyma.10G164700	-0.057706	0.9919232570190001	-	hypothetical protein JHK87_028282
Glyma.13G257900	0	1	-	hypothetical protein JHK87_037268
Glyma.06G241100	-8.56439	0.60846	-	hypothetical protein JHK85_016725
Glyma.11G111300	1.01089	0.00955431702731	-	TATA box-binding protein-associated factor RNA polymerase
Glyma.07G070600	-0.352914	0.446014	-	post-GPI attachment to proteins factor 3
Glyma.02G312100	9.259813866939998	0.7582899692849999	-	hypothetical protein JHK85_006074
Glyma.13G038500	0	1	-	transcription factor MYB17
Glyma.10G075200	-0.521143	0.252165	-	sorting nexin-1-like isoform X1
Glyma.03G134500	1.8641933591599997	0.00898465052149	-	zeatin O-glucosyltransferase
Glyma.10G176900	-0.58671	0.7345520925869999	-	probable fructokinase-5
Glyma.13G257000	8.29924	0.627702	-	MADS-box protein JOINTLESS-like isoform X3
Glyma.20G100451	0	1	-	hypothetical protein GLYMA_20G100451v4
Glyma.10G150700	0	1	-	probable pectinesterase/pectinesterase inhibitor 21
Glyma.06G028200	-0.667121	0.398134	-	hypothetical protein JHK86_014230
Glyma.10G174500	5.3489	0.000341959170333	up	hypothetical protein GLYMA_10G174500v4
Glyma.20G216800	0	1	-	-
Glyma.11G088400	0.132831	0.349767	-	AT-rich interactive domain-containing protein 6
Glyma.03G236900	0.782165	0.0700432780075	-	sucrose nonfermenting 4-like protein
Glyma.02G032800	-1.34839	0.006957746349449999	down	threonine--tRNA ligase, mitochondrial 1
Glyma.19G071451	0	1	-	hypothetical protein GLYMA_19G071451v4
Glyma.07G077800	0	1	-	hypothetical protein GYH30_017719
Glyma.05G240000	-1.22727	0.0471683156212	-	glutamyl-tRNA(Gln) amidotransferase subunit B, chloroplastic/mitochondrial
Glyma.11G041701	-8.32558	0.695369	-	hypothetical protein GLYMA_11G041701v4
Glyma.01G168700	10.733724345299999	0.438416	-	hypothetical protein GYH30_001839
Glyma.08G209200	-1.26438	0.0895822216419	-	uncharacterized protein LOC100778209
Glyma.15G272900	1.78607	0.00143850497795	up	uncharacterized protein LOC100787464
Glyma.15G112300	-2.21014	0.0070579285366	down	pyrophosphate--fructose 6-phosphate 1-phosphotransferase subunit beta
Glyma.17G027500	0.142269	0.6794498783130001	-	uncharacterized protein LOC100798085
Glyma.03G207500	-0.84452	0.0389822257245	-	putative 60S ribosomal protein L21
Glyma.04G153800	-9.45561	0.716587	-	hypothetical protein GLYMA_04G153800v4
Glyma.08G269366	-11.3709	0.0171273504522	-	hypothetical protein GLYMA_08G269366v4
Glyma.16G052700	0.299252	0.129702	-	regulation of nuclear pre-mRNA domain-containing protein
Glyma.11G075800	-0.724309	0.728429	-	zinc finger CCCH domain-containing protein 6
Glyma.09G073900	-2.06449	0.08927937415619999	-	photosystem II subunit X-like protein
Glyma.05G175900	0.404141	0.13536445294500002	-	protein SCAI homolog isoform X1
Glyma.09G133875	-0.500026	0.733978	-	hypothetical protein GLYMA_09G133875v4
Glyma.04G036100	-5.64822	0.0142466689611	-	protein NRT1/ PTR FAMILY 4.5
Glyma.08G067000	-1.39177	0.00460953436342	down	uncharacterized protein LOC100500139
Glyma.16G193000	-6.17646	0.699649	-	hypothetical protein GLYMA_16G193000v4
Glyma.18G124500	-0.507636	0.251649	-	probable LRR receptor-like serine/threonine-protein kinase At1g14390
Glyma.19G004300	1.8283657604199999	0.00794857937524	up	hypothetical protein GLYMA_19G004300v4
Glyma.07G018600	-0.983382	0.121554	-	hypothetical protein GYH30_017124
Glyma.16G129750	0	1	-	hypothetical protein GLYMA_16G129750v4
Glyma.17G236000	0	1	-	hypothetical protein JHK86_048534
Glyma.07G069600	-0.69036	0.24051	-	ascorbate transporter, chloroplastic
Glyma.11G172900	-0.239427	0.91053	-	hypothetical protein JHK85_032329
Glyma.18G018600	-1.27501	0.0536837821485	-	inositol-3-phosphate synthase isoform X2
Glyma.14G099100	0.682134	0.07739912394989999	-	peroxisome biogenesis factor 10
Glyma.18G026500	-0.127342	0.921756	-	probable 2-oxoglutarate-dependent dioxygenase At5g05600
Glyma.09G152300	-1.03778	0.06369759647710001	-	K(+) efflux antiporter 5
Glyma.05G081900	1.03009	0.00407760892121	up	serine/threonine-protein kinase SAPK10
Glyma.07G213000	-0.514617	0.53677	-	cold-regulated protein 27 isoform X2
Glyma.07G050900	0	1	-	probable L-gulonolactone oxidase 4
Glyma.13G346700	-1.72174	0.00498785498897	down	endochitinase PR4
Glyma.03G210300	-0.0962001	0.8686062081360001	-	OVARIAN TUMOR DOMAIN-containing deubiquitinating enzyme 5-like
Glyma.13G029100	0.265715	0.567563	-	hypothetical protein JHK87_035021
Glyma.13G085200	3.0082996419200003	0.69448	-	hypothetical protein JHK87_035606
Glyma.16G199300	0.308726	0.128889	-	zinc finger CCCH domain-containing protein 48
Glyma.04G211200	0	1	-	hypothetical protein GYH30_010638
Glyma.08G049800	-1.53545	0.247765	-	hypothetical protein GYH30_020281
Glyma.14G153800	0	1	-	hypothetical protein GYH30_040075
Glyma.09G135000	0	1	-	hypothetical protein GLYMA_09G135000v4
Glyma.09G247100	-1.43015	0.0167904186996	-	putative acyl carrier protein, mitochondrial
Glyma.20G103600	0.6215963081889999	0.211946	-	hypothetical protein JHK86_055864
Glyma.05G088700	0.869086	0.0736803335441	-	hypothetical protein JHK86_012224
Glyma.02G045000	-1.00298	0.129558	-	aspartyl protease family protein 1 isoform
Glyma.08G341600	12.403739048199999	0.00119488895042	up	kunitz family trypsin and protease inhibitor
Glyma.13G294800	-2.46064	0.0158977167545	-	reticulon-like protein B17
Glyma.08G035102	2.16443	0.0215926528174	-	hypothetical protein GLYMA_08G035102v4
Glyma.18G296900	0	1	-	hypothetical protein GLYMA_18G296900v4
Glyma.02G136200	1.8897	0.0643306180509	-	gibberellin 20 oxidase 1-like
Glyma.03G031300	2.27965	0.0349521	-	hypothetical protein JHK85_006372
Glyma.18G248400	1.28497	0.0045977677879	up	cysteine protease ATG4 isoform X2
Glyma.04G094300	-0.198414	0.853638	-	mechanosensitive ion channel protein 2, chloroplastic
Glyma.16G071500	-1.1568	0.09746409024779999	-	hypothetical protein GLYMA_16G071500v4
Glyma.02G296400	-0.90762	0.00812436553965	-	glycerophosphodiester phosphodiesterase GDPDL1
Glyma.07G234300	0.049041953653300004	0.571213	-	Pti1 kinase-like protein
Glyma.20G093200	-1.30016	0.00342523425314	down	receptor protein kinase
Glyma.15G047400	0.7570281921259999	0.35817770001000004	-	RHOMBOID-like protein 10, chloroplastic isoform X1
Glyma.19G145200	0.45554298988200004	0.31416672396699996	-	polygalacturonase inhibitor
Glyma.10G208600	0	1	-	hypothetical protein JHK87_028691
Glyma.12G034900	8.28437	0.627702	-	auxin-induced protein X10A-like
Glyma.04G088100	0.442508	0.0496416234314	-	KH domain-containing protein HEN4 isoform X2
Glyma.06G139800	0.25267776823000004	0.134501	-	COP1-interacting protein 7 isoform X2
Glyma.17G131800	-0.713297	0.837648	-	ethylene-responsive transcription factor ERF027
Glyma.16G070400	0.699697	0.015720512512700003	-	altered inheritance of mitochondria protein 32
Glyma.02G288400	-0.478274	0.299013	-	Ubiquinone biosynthesis O-methyltransferase, mitochondrial-like
Glyma.13G233600	-12.8435	0.004403641652600001	down	hypothetical protein GLYMA_13G233600v4
Glyma.08G064000	0	1	-	hypothetical protein JHK87_020526
Glyma.01G090300	0	1	-	hypothetical protein GYH30_000968
Glyma.19G023200	-0.707994	0.334667	-	C2C2-Zn Dof transcription factor
Glyma.07G009200	-0.71838	0.154624	-	uncharacterized protein LOC100526960
Glyma.03G087801	0	1	-	hypothetical protein GLYMA_03G087801v4
Glyma.04G247700	-0.874642	0.106027	-	delta-aminolevulinic acid dehydratase, chloroplastic
Glyma.12G088300	4.18217	0.000161183879713	up	protein ADP-ribosyltransferase PARP3 isoform X3
Glyma.06G074260	-0.437154	0.797146	-	hypothetical protein GLYMA_06G074260v4
Glyma.18G111400	0.47225706863899997	0.237657	-	disease resistance RPP13-like protein 4
Glyma.18G005400	0.37971579090700003	0.168789	-	F-box only protein 6 isoform X3
Glyma.18G223900	-1.26708	0.009353440382379999	-	cucumber peeling cupredoxin
Glyma.20G087650	0	1	-	hypothetical protein GLYMA_20G087650v4
Glyma.05G217400	-0.372633	0.480446	-	GDSL esterase/lipase At4g10955
Glyma.13G325800	-0.914795	0.19161	-	uncharacterized protein LOC100814909
Glyma.17G023900	8.7109	0.5987223871790001	-	monothiol glutaredoxin-S2
Glyma.20G031000	0	1	-	ethylene-responsive transcription factor ERN2
Glyma.16G119900	0	1	-	hypothetical protein GYH30_044883
Glyma.09G202700	-0.717578	0.422085	-	uncharacterized protein LOC100527180 isoform 2
Glyma.03G177200	-1.86576	0.0173346237708	-	uncharacterized protein LOC100819096
Glyma.01G101000	-0.0290281	0.7496983171330001	-	L-type lectin-domain containing receptor kinase S.4
Glyma.16G193900	0	1	-	hypothetical protein GLYMA_16G193900v4, partial
Glyma.04G134900	-0.0531051	0.692467	-	decapping protein 5-like protein
Glyma.18G224700	-10.6267	0.60846	-	hypothetical protein JHK87_051006
Glyma.09G121100	0	1	-	hypothetical protein GLYMA_09G121100v4
Glyma.07G206601	0.204583	0.876774	-	hypothetical protein GLYMA_07G206601v4
Glyma.19G245400	-1.51862	0.016928802862499998	-	wound-induced protein precursor
Glyma.20G191400	-0.182229	0.835911	-	uncharacterized protein LOC100805607 isoform X2
Glyma.17G163700	0.07728651932630001	0.502738	-	casein kinase II subunit alpha-2-like
Glyma.03G218200	-2.68766	0.12140937801400001	-	transcription factor MYB111
Glyma.06G076800	7.71351	0.7582899692849999	-	hypothetical protein JHK87_014569
Glyma.01G204700	-0.51366	0.949721	-	chlorophyll A-B binding family protein
Glyma.05G035000	-0.854337	0.158062	-	nucleobase-ascorbate transporter 6
Glyma.13G363600	-0.922342	0.8729503553679999	-	probable E3 ubiquitin-protein ligase makorin-2
Glyma.17G134400	0	1	-	hypothetical protein GYH30_047182
Glyma.16G173200	0.224229	0.531714	-	hypothetical protein GLYMA_16G173200v4
Glyma.07G040400	0.5997332402100001	0.12963755653200001	-	uncharacterized protein LOC100803697 isoform X2
Glyma.02G152800	0.89085	0.0113369782916	-	protein TRANSPORT INHIBITOR RESPONSE 1A
Glyma.16G077800	-2.13221	0.039641923787300005	-	hypothetical protein GYH30_044449
Glyma.08G323800	1.9011850360299998	0.018641	-	hypothetical protein GLYMA_08G323800v4
Glyma.11G215600	-2.49118	0.000559189287614	down	condensin complex subunit 3
Glyma.13G172700	0.6507970871509999	0.22791	-	WUSCHEL-related homeobox 9
Glyma.11G061000	-0.936079	0.0205648603043	-	tetratricopeptide repeat superfamily protein
Glyma.03G073748	-0.0900962	0.939467	-	hypothetical protein GLYMA_03G073748v4
Glyma.18G014250	0	1	-	RING-H2 finger protein ATL34-like
Glyma.08G154201	9.841826393869999	0.5987223871790001	-	hypothetical protein GLYMA_08G154201v4
Glyma.17G094300	0.18594	0.31084598964899995	-	pentatricopeptide repeat-containing protein At1g74850, chloroplastic isoform
Glyma.18G196600	0	1	-	hypothetical protein JHK85_051737
Glyma.02G132400	-1.33294	0.0128213267563	-	LAG1 longevity assurance homolog 2 isoform
Glyma.09G014300	-0.665337	0.530405	-	trihelix transcription factor GTL1
Glyma.10G068201	-6.90404	0.716587	-	hypothetical protein GLYMA_10G068201v4
Glyma.19G157400	0.35389491488799996	0.774792	-	hypothetical protein JHK85_054545
Glyma.18G036102	2.0395036221700003	0.000149165727984	up	hypothetical protein GLYMA_18G036102v4
Glyma.18G262450	-0.546358	0.673803	-	hypothetical protein GLYMA_18G262450v4
Glyma.03G033900	-1.38811	0.152355	-	cyclin-U2-1-like
Glyma.06G207600	-1.297	0.566365	-	protein SOB FIVE-LIKE 4 isoform X1
Glyma.14G075300	-1.06666	0.0169407811414	-	phosphatidylinositol transfer protein 3
Glyma.04G147000	-0.351719	0.773498	-	EIN3-binding F-box protein 1
Glyma.10G241100	-14.3919	2.3307198357900003e-08	down	hypothetical protein GLYMA_10G241100v4
Glyma.12G147600	1.2531	0.0019650863594	up	uncharacterized protein LOC100527638
Glyma.06G126350	0	1	-	hypothetical protein GLYMA_06G126350v4
Glyma.01G235700	-0.0607726	0.751643	-	DExH-box ATP-dependent RNA helicase DExH16, mitochondrial
Glyma.08G103100	0.40737271740099995	0.179452	-	U-box domain-containing protein 6
Glyma.14G170600	-11.2389	0.052972563581800004	-	probable glucan 1,3-beta-glucosidase A
Glyma.12G021700	0.0405563479299	0.550907	-	hexokinase-3
Glyma.05G078300	0.511194	0.122982	-	hypothetical protein GYH30_011930
Glyma.11G238800	-2.03829	6.81389834001e-05	down	myo-inositol-3-phosphate synthase
Glyma.15G178700	-6.83027	0.8699851219760001	-	hypothetical protein JHK86_042706
Glyma.09G084500	-0.80826	0.130093	-	hypothetical protein GLYMA_09G084500v4
Glyma.08G103800	-1.15216	0.00288653654324	down	probable arabinosyltransferase ARAD1 isoform X1
Glyma.16G069700	-8.51246	0.60846	-	hypothetical protein GYH30_044373
Glyma.13G035400	1.05687	0.0049522767320699995	up	hypothetical protein GLYMA_13G035400v4
Glyma.13G011200	-0.750545	0.9100883909899999	-	hypothetical protein GLYMA_13G011200v4
Glyma.07G242000	1.0842198917299999	0.0042078960652	up	hypothetical protein GLYMA_07G242000v4
Glyma.01G108700	-2.83264	6.15901909762e-05	down	putative PAR1 protein precursor
Glyma.12G035100	10.278217121499999	0.627702	-	hypothetical protein JHK86_032795
Glyma.12G115000	0	1	-	hypothetical protein GLYMA_12G115000v4
Glyma.14G017900	-0.546716	0.337296	-	putative BPI/LBP family protein At1g04970
Glyma.04G032400	1.78092	0.00977319575017	-	uncharacterized protein LOC100805062
Glyma.15G192800	-1.66815	0.032439054023099996	-	hypothetical protein GLYMA_15G192800v4
Glyma.12G137901	0	1	-	hypothetical protein GLYMA_12G137901v4
Glyma.09G160700	-0.661009	0.276797	-	uncharacterized protein LOC102663456 isoform X3
Glyma.20G050900	0.0655205461919	0.473518	-	non-structural maintenance of chromosomes element 1
Glyma.02G109900	0.25366912819299997	0.334158	-	protein SHORT ROOT IN SALT MEDIUM
Glyma.04G122300	-1.70417	0.19485795094500002	-	hypothetical protein JHK87_009697
Glyma.16G162900	0	1	-	probable xyloglucan endotransglucosylase/hydrolase protein 8 isoform
Glyma.02G103200	0	1	-	transcription factor bHLH95
Glyma.08G339800	-8.75867	0.215319	-	hypothetical protein GLYMA_08G339800v4
Glyma.18G116200	-1.72755	0.0196670287707	-	hypothetical protein GYH30_049693
Glyma.06G043900	-2.45842	0.009275830486399999	-	putative cyclin-A3-1
Glyma.20G108200	0	1	-	hypothetical protein GYH30_055487
Glyma.03G132000	-0.767614	0.12296884047800001	-	GTP-binding protein BRASSINAZOLE INSENSITIVE PALE GREEN
Glyma.06G308100	-3.04723	0.006821712165360001	down	condensin complex subunit 2
Glyma.14G194100	1.21293	0.020503225696900003	-	zinc finger CCCH domain-containing protein 66
Glyma.05G191500	2.5328	0.000532865418366	up	uncharacterized protein LOC102660360
Glyma.19G052500	-8.41834	0.683558	-	hypothetical protein JHK86_052422
Glyma.02G187500	0	1	-	uncharacterized protein LOC100305810
Glyma.18G276100	0	1	-	TPD1 protein homolog 1A
Glyma.02G201900	9.36637	0.627702	-	uncharacterized protein LOC100780740
Glyma.04G235200	-0.469692	0.436974	-	soluble starch synthase 1, chloroplastic/amyloplastic
Glyma.06G074400	-0.735843	0.0420781734234	-	hypothetical protein GYH30_014365
Glyma.07G010600	-0.293699	0.747699	-	uncharacterized protein LOC100305896
Glyma.10G008021	0.0826085594406	0.6171434227929999	-	uncharacterized protein At4g14450, chloroplastic
Glyma.09G038700	-0.65796	0.235385	-	hypothetical protein GLYMA_09G038700v4
Glyma.13G328300	-0.676951	0.07603861737510001	-	protein disulfide-isomerase 5-1-like precursor
Glyma.02G124500	0.0969556405986	0.542153	-	heat shock protein 90-5, chloroplastic
Glyma.18G086300	-0.319128	0.907096	-	hypothetical protein GLYMA_U031329v4
Glyma.02G198000	-0.157485	0.970909	-	protein SMAX1-LIKE 3
Glyma.11G207000	-3.87617	0.0023759413766999997	down	cysteine-rich receptor-like protein kinase precursor
Glyma.14G091300	-1.13031	0.18345372307500002	-	endo-1,4-beta-xylanase 1 isoform X1
Glyma.09G047300	-2.39303	0.0537451194946	-	DNA replication licensing factor MCM6
Glyma.17G026300	2.8691461272900005	0.00787211862544	up	putative F-box protein At1g67623
Glyma.12G043100	-0.0553385	0.8803210688140001	-	hypothetical protein GLYMA_12G043100v4
Glyma.18G106800	-1.21027	0.0264862394931	-	Mitogen-activated protein kinase 10
Glyma.13G205000	-0.0850367	0.8675040293999999	-	uncharacterized protein LOC100798894
Glyma.06G184000	0	1	-	hypothetical protein JHK87_015585
Glyma.09G069100	-7.66631	0.683558	-	hypothetical protein GLYMA_09G069100v4
Glyma.17G125200	0	1	-	hypothetical protein JHK87_047021
Glyma.13G129300	-2.10084	0.0706479682581	-	protein LOW PSII ACCUMULATION 1, chloroplastic
Glyma.14G042200	0.0177962135991	0.8712471196259999	-	alcohol dehydrogenase-like 7
Glyma.02G240700	-0.0395749	0.8509018121969999	-	autophagy protein 5
Glyma.17G233000	0.594092	0.05809540797619999	-	pre-mRNA-processing protein 40A isoform X1
Glyma.09G052400	0.546275	0.149467	-	protein RGF1 INDUCIBLE TRANSCRIPTION FACTOR 1
Glyma.18G093900	-1.7891	0.715191	-	hypothetical protein GLYMA_18G093900v4
Glyma.08G023300	0.289408	0.0712102532835	-	dynamin-related protein 5A
Glyma.05G213000	0.14683593896400002	0.30071	-	uncharacterized protein LOC100779061
Glyma.05G056700	-0.142186	0.922898	-	probable lipid phosphate phosphatase beta
Glyma.20G021700	-0.223049	0.845358	-	exocyst complex component EXO84C
Glyma.08G247500	0.628369	0.137087	-	protein LONGIFOLIA 1
Glyma.10G224451	0.245084	0.8166793361229999	-	hypothetical protein GLYMA_10G224451v4
Glyma.01G194000	10.663231934099999	0.221962	-	adenylyl-sulfate kinase, chloroplastic
Glyma.08G132800	0.43498845367600003	0.322993	-	homeodomain-leucine zipper protein 56
Glyma.18G225300	0.6873886912360001	0.7146531021349999	-	BON1-associated protein 2-like
Glyma.13G235800	0.786523	0.0034027917168800003	-	uncharacterized protein LOC100795179 precursor
Glyma.20G184500	-1.53989	0.297257	-	trihelix transcription factor ASR3
Glyma.08G204300	-0.408758	0.607462	-	malonate--CoA ligase isoform X1
Glyma.03G036600	-1.1346	0.0317627234925	-	transcription repressor OFP1
Glyma.01G206100	-2.84654	0.00031227700084900003	down	uncharacterized protein LOC102668205
Glyma.01G244800	-8.65967	0.525596	-	hypothetical protein GLYMA_01G244800v4
Glyma.01G103450	0.418583	0.673215	-	hypothetical protein GLYMA_01G103450v4
Glyma.07G156901	0.948501	0.0734548454607	-	hypothetical protein GLYMA_07G156901v4
Glyma.03G001000	-1.0354	0.397089	-	cell adhesion molecule-related/down-regulated by oncogenes
Glyma.18G269400	1.8881832731400001	0.0016370036133900002	up	hypothetical protein GYH30_051233
Glyma.16G201300	-10.8124	0.0673951	-	helix-loop-helix domain-containing protein isoform X1
Glyma.03G130700	-1.2941	0.0883134144918	-	hypothetical protein JHK87_007201
Glyma.07G267700	-0.047258	0.68108	-	heavy metal-associated isoprenylated plant protein 7
Glyma.09G156500	-0.186433	0.785773	-	histone-lysine N-methyltransferase ASHH3 isoform X1
Glyma.16G078100	-3.78246	0.00571680603836	down	putative ABC transporter B family member
Glyma.20G079450	9.96495	0.332937	-	hypothetical protein GLYMA_20G079450v4
Glyma.10G010300	0.538044	0.529606	-	transcription factor MYB78
Glyma.01G034500	-11.4587	0.021928123311900003	-	hypothetical protein GYH30_000354
Glyma.03G069300	-1.32094	0.151652	-	L-type lectin-domain containing receptor kinase S.4
Glyma.10G262200	0.171107	0.357771	-	PRKR-interacting protein 1
Glyma.20G054900	-1.21714	0.44138504732100003	-	hypothetical protein GLYMA_20G054900v4
Glyma.06G275000	-0.207401	0.789584	-	hypothetical protein GLYMA_06G275000v4
Glyma.17G248100	-0.0796991	0.8329178920550001	-	universal stress protein PHOS32
Glyma.14G190700	-2.80524	0.0006590383675399999	down	calmodulin-binding receptor-like cytoplasmic kinase 2
Glyma.06G093700	-7.5318	0.683558	-	hypothetical protein JHK87_014725
Glyma.09G094900	0.329022	0.38225	-	uncharacterized protein LOC114367849
Glyma.11G138967	0.129179	0.8899176788850001	-	hypothetical protein GLYMA_11G138967v4
Glyma.08G328100	-8.22073	0.695369	-	hypothetical protein GYH30_023157
Glyma.11G148100	-2.24877	0.0337011311626	-	fasciclin-like arabinogalactan protein 12
Glyma.11G161947	-1.34766	0.30412	-	carotenoid cleavage dioxygenase 7
Glyma.02G248300	-0.037783	0.718768	-	AP3-complex subunit beta-A
Glyma.12G226100	-0.728497	0.121288	-	probable protein phosphatase 2C
Glyma.07G054000	0.0563001417419	0.703215	-	MYB-like transcription factor 4
Glyma.10G247700	-0.840857	0.257594	-	pentatricopeptide repeat-containing protein At4g14850
Glyma.14G065251	0.8773493181799998	0.488263	-	hypothetical protein GLYMA_14G065251v4
Glyma.17G002100	0.927408	0.00994781061451	-	protein root UVB sensitive 6
Glyma.12G085300	0.90759	0.23803571171000001	-	hypothetical protein GYH30_033105
Glyma.02G299300	-7.45919	0.716587	-	pectinesterase QRT1
Glyma.19G148200	-1.08927	0.047730169273100004	-	metal tolerance protein C2
Glyma.18G270001	-11.2197	0.039096389097699996	-	hypothetical protein GLYMA_18G270001v4
Glyma.15G172800	0	1	-	uncharacterized protein LOC100814053
Glyma.06G158600	0.980235	0.00366504177277	-	protein HESO1 isoform X1
Glyma.06G062433	3.9510664178500003	0.117366	-	hypothetical protein GLYMA_06G062433v4
Glyma.07G045967	-0.277813	0.874386	-	hypothetical protein JHK85_017982
Glyma.10G212100	-2.35794	0.0009720919544179999	down	rhomboid-like protein 19
Glyma.12G231700	0.778975	0.029266331763400003	-	uncharacterized protein LOC100815050
Glyma.08G345200	0.51842	0.0294892186613	-	ubiquinone biosynthesis monooxygenase COQ6, mitochondrial
Glyma.20G248100	0.315963	0.378569	-	-
Glyma.14G201000	-0.578285	0.25096699463399996	-	uncharacterized protein LOC100808660
Glyma.19G055100	-0.339326	0.604391	-	cystinosin homolog isoform X1
Glyma.16G143200	-0.911471	0.09041951176560001	-	uncharacterized protein LOC100816025
Glyma.02G164164	8.30317	0.5987223871790001	-	hypothetical protein GLYMA_02G164164v4
Glyma.07G017700	1.17936	0.000307085895788	up	protein MODIFIED TRANSPORT TO THE VACUOLE
Glyma.07G216400	0.12025426030099999	0.44108741138199997	-	uncharacterized protein LOC100306423
Glyma.16G028200	0.030844370901099996	0.7114530686839999	-	ribonuclease 2
Glyma.07G101000	-2.6744	0.136688	-	WUSCHEL-related homeobox 1
Glyma.05G239000	-0.207484	0.981542	-	40S ribosomal protein S2-4
Glyma.05G105800	-1.72476	0.028986684788900003	-	hypothetical protein GYH30_012250
Glyma.06G185800	-0.930811	0.571597	-	hypothetical protein GLYMA_06G185800v4
Glyma.13G241000	1.08417	0.0184911098989	-	acetohydroxy acid synthetase
Glyma.13G063050	0	1	-	hypothetical protein GLYMA_13G063050v4
Glyma.01G099000	-9.39286	0.695369	-	hypothetical protein GYH30_001068
Glyma.03G165300	0.561588	0.38405354572300004	-	hypothetical protein GYH30_007440
Glyma.02G186600	0.38438638796700003	0.627551	-	probable glycerol-3-phosphate dehydrogenase
Glyma.04G052200	-0.061021	0.75714	-	protein IQ-DOMAIN 1
Glyma.10G114400	0	1	-	hypothetical protein GLYMA_10G114400v4
Glyma.07G108300	0	1	-	vacuolar-sorting receptor 1 isoform X2
Glyma.01G083800	-0.324094	0.9425828919850001	-	hypothetical protein GYH30_000901
Glyma.01G145501	-2.08074	0.261356	-	hypothetical protein GLYMA_01G145501v4
Glyma.18G016800	-0.898099	0.055660313505999995	-	ubiquitin-specific protease
Glyma.06G159100	0.555423	0.123015	-	probable magnesium transporter NIPA6
Glyma.20G245400	0.415803	0.058094555561300006	-	-
Glyma.06G051600	-0.262827	0.970085	-	Homeobox protein ATH1
Glyma.02G012100	-0.0177672	0.595644	-	histone-lysine N-methyltransferase EZA1
Glyma.08G032400	0	1	-	profilin
Glyma.U031222	0.564105	0.00872255850829	-	lipoyl synthase 2, mitochondrial
Glyma.05G150600	1.26684	0.0157224766805	-	phloretin 4'-O-glucosyltransferase
Glyma.12G114300	-9.31342	0.290796	-	transcription factor bHLH162
Glyma.13G297500	0.334984	0.161712	-	DTW domain-containing protein isoform X2
Glyma.06G204800	-0.319448	0.8667420830820001	-	tip elongation aberrant protein 1 isoform
Glyma.07G028400	0.260819	0.20632007791700002	-	2-methoxy-6-polyprenyl-1,4-benzoquinol methylase, mitochondrial isoform X1
Glyma.10G163500	0	1	-	uncharacterized protein At2g34160
Glyma.09G161400	-0.567322	0.656065	-	TMV resistance protein N isoform X1
Glyma.19G202600	-0.690579	0.115841	-	F-box protein At5g06550
Glyma.02G200200	0	1	-	protein GL2-INTERACTING REPRESSOR 1
Glyma.10G138402	2.2260151275999998	0.496252	-	hypothetical protein GLYMA_10G138402v4
Glyma.20G159100	0.7007069620999999	0.030907179221099996	-	uncharacterized protein LOC121174300
Glyma.13G006800	0	1	-	hypothetical protein JHK87_034894
Glyma.09G260800	0	1	-	hypothetical protein JHK87_026171
Glyma.13G365067	-0.410388	0.8274033607060001	-	hypothetical protein GLYMA_13G365067v4
Glyma.06G190200	-1.01783	0.024545875515999998	-	HDZip I protein
Glyma.02G202500	-2.69488	0.0035254454767499996	down	NADP-dependent glyceraldehyde-3-phosphate dehydrogenase
Glyma.03G044250	0	1	-	hypothetical protein GLYMA_03G044250v4
Glyma.05G047800	0.6725147611560001	0.038952768470199996	-	exocyst complex component EXO70B1
Glyma.19G018501	2.54256	0.0247255223288	-	hypothetical protein GLYMA_19G018501v4
Glyma.10G025000	0.851627	0.0228474923806	-	hypothetical protein GLYMA_10G025000v4
Glyma.18G265000	0.161043	0.28363	-	uncharacterized protein LOC100803425
Glyma.04G096500	-1.54515	0.45379094314400004	-	hypothetical protein GLYMA_04G096500v4
Glyma.07G238550	-1.07589	0.503211	-	hypothetical protein GLYMA_07G238550v4
Glyma.09G188500	-0.284444	0.742013	-	uncharacterized protein LOC100788574
Glyma.03G077400	1.18495	0.0253793144252	-	disease resistance protein RPV1
Glyma.15G261800	0.610307	0.106958	-	uncharacterized protein LOC100800880
Glyma.12G042200	-0.441808	0.643529	-	hypothetical protein JHK85_033476
Glyma.14G144200	0	1	-	amino acid permease 8
Glyma.20G212200	0.5846225538090001	0.09024593220689998	-	AT-hook motif nuclear-localized protein 6
Glyma.06G002700	-0.350321	0.483468	-	uncharacterized protein LOC100781926 isoform X2
Glyma.16G144800	0.275903	0.210875	-	uncharacterized protein LOC100794694
Glyma.20G117900	-0.397327	0.35415491627800005	-	chaperone protein dnaJ 15
Glyma.05G128800	0.7219314280779999	0.8301604141079999	-	uncharacterized protein LOC100789707
Glyma.18G026800	-0.0351997	0.9990848840559999	-	putative serine/threonine-protein kinase-like protein CCR3
Glyma.05G041400	2.9159534471399997	6.23210758991e-06	up	plant intracellular Ras-group-related LRR protein 9
Glyma.18G054700	0.312211	0.295423	-	uncharacterized protein LOC100799694
Glyma.13G320600	-10.4775	0.049714858018699994	-	GDSL esterase/lipase At5g22810
Glyma.14G098000	-0.00134057	0.807588	-	guanine nucleotide-binding protein alpha-2 subunit isoform
Glyma.05G199300	4.66639	4.7230523343400005e-06	up	uncharacterized protein LOC100305868
Glyma.02G198300	-0.667426	0.489878	-	cytokinin riboside 5'-monophosphate phosphoribohydrolase LOG7
Glyma.04G249000	1.55458	0.009468719198860002	-	NAC domain-containing protein
Glyma.13G045100	-2.50751	0.27417	-	hypothetical protein GYH30_035129
Glyma.15G166100	-0.91865	0.09759698908469999	-	hypothetical protein GYH30_042591
Glyma.15G147500	9.243864216950001	0.162378	-	hypothetical protein JHK87_042302
Glyma.17G261300	-1.91621	0.00170505206175	down	uncharacterized protein At1g76070
Glyma.03G114300	1.9592206523599998	0.00318468393689	up	homeobox-leucine zipper protein HAT3
Glyma.17G258600	-1.3611	0.290968	-	thaumatin-like protein 1 isoform X1
Glyma.02G077800	8.188901993160002	0.7582899692849999	-	hypothetical protein JHK85_003638
Glyma.08G007000	0	1	-	(+)-neomenthol dehydrogenase
Glyma.08G039200	-3.36584	0.000245376620118	down	aldehyde dehydrogenase family 2 member C5
Glyma.10G012400	-3.8818	9.28700231107e-05	down	uncharacterized protein LOC100783287
Glyma.18G224000	-0.797343	0.146636	-	calcium-dependent lipid-binding protein
Glyma.15G026900	-1.19949	0.188614	-	uncharacterized protein LOC100811539 isoform X1
Glyma.14G014700	-1.01825	0.113068	-	serine acetyltransferase 1, chloroplastic
Glyma.06G238600	-0.777105	0.877508	-	hypothetical protein JHK85_016693
Glyma.19G245200	-2.33464	0.00125513039205	down	auxin-responsive protein IAA16
Glyma.11G025500	2.2816157537599997	0.125887	-	methyl-CpG-binding domain-containing protein 13 isoform X2
Glyma.16G034900	0.0965753898499	0.390465	-	hypothetical protein JHK86_044290
Glyma.10G136900	0	1	-	pectinesterase
Glyma.19G076800	0.9532166595200001	0.36531826860399996	-	lysine histidine transporter 1
Glyma.01G141400	0	1	-	S-protein homolog 24
Glyma.04G024300	-0.888083	0.11040312092900001	-	ER lumen protein-retaining receptor erd-2.2
Glyma.07G161000	-1.34804	0.0950673970833	-	deSI-like protein At4g17486 isoform X1
Glyma.13G243000	0	1	-	hypothetical protein GLYMA_13G243000v4
Glyma.18G061100	-0.690984	0.22204223098900003	-	asparagine synthetase 1
Glyma.20G064551	0.554712	0.9120886380230001	-	hypothetical protein GLYMA_20G064551v4
Glyma.11G190600	-2.49219	0.0365311605524	-	GDSL esterase/lipase At5g22810 isoform X1
Glyma.20G175100	-0.863356	0.172452	-	calmodulin-like domain protein kinase isoenzyme beta
Glyma.01G089900	0.0622578325612	0.222707	-	protein decapping 5 isoform X1
Glyma.18G235300	0.522635	0.041142147075900005	-	probable E3 ubiquitin-protein ligase RHB1A
Glyma.04G236900	1.30229	0.0145097748511	-	glutamate synthase
Glyma.09G006200	-10.4771	0.412564	-	stigma-specific STIG1-like protein 1
Glyma.02G012800	-0.693329	0.125779	-	hypothetical protein GLYMA_02G012800v4
Glyma.14G151150	0	1	-	hypothetical protein GLYMA_14G151150v4
Glyma.16G184000	-2.09556	0.259505	-	hypothetical protein GLYMA_16G184000v4
Glyma.16G192600	-7.88521	0.586336	-	hypothetical protein GLYMA_16G192600v4
Glyma.15G260900	0	1	-	hypothetical protein GYH30_043504
Glyma.06G271500	-0.263072	0.6910898126839999	-	probable serine/threonine-protein kinase abkC
Glyma.05G161700	-1.30808	0.040701109529199996	-	ER lumen protein-retaining receptor
Glyma.02G293600	-0.0274226	0.602214	-	adenylyltransferase and sulfurtransferase MOCS3-like
Glyma.02G249400	0	1	-	protein RADIALIS-like 3
Glyma.03G164800	-0.364832	0.44686955483199997	-	vacuolar protein sorting-associated protein 2 homolog
Glyma.10G200100	-0.783478	0.24791562066700001	-	phosphoglucan phosphatase DSP4, amyloplastic isoform X2
Glyma.06G017500	-1.5357	0.012561127650899999	-	serine/threonine-protein kinase PBS1-like
Glyma.08G169451	-0.776677	0.325106	-	transcription factor JUNGBRUNNEN 1
Glyma.14G088700	0.985708	0.0954998947137	-	F-box/kelch-repeat protein At5g43190
Glyma.19G080400	-0.045452	0.7734790549230001	-	uncharacterized membrane protein At3g27390
Glyma.19G236600	3.28218	0.013475695502799999	-	basic 7S globulin 2 precursor
Glyma.08G265001	0	1	-	hypothetical protein GLYMA_08G265001v4
Glyma.08G077700	-0.125768	0.846847	-	pentatricopeptide repeat-containing protein At1g62260, mitochondrial
Glyma.13G193300	0.643507	0.08921100058749999	-	putative disease resistance protein At3g14460
Glyma.19G025500	0	1	-	hypothetical protein GYH30_051834
Glyma.01G202000	-0.366849	0.6116204766350001	-	uncharacterized protein LOC100793483 isoform X1
Glyma.03G253000	-0.557526	0.334696	-	protein PIR
Glyma.11G148200	-8.08218	0.515729	-	fasciclin-like arabinogalactan protein 12
Glyma.20G165500	-0.246166	0.966877	-	hypothetical protein JHK86_056448
Glyma.20G142000	-1.36732	0.256634	-	thiamine thiazole synthase 2, chloroplastic
Glyma.09G076800	0	1	-	hypothetical protein GYH30_024366
Glyma.18G195800	2.99601	5.0515471211699995e-06	up	E3 ubiquitin-protein ligase HAKAI homolog
Glyma.20G219300	3.13062	0.11707086106799999	-	-
Glyma.10G028600	-0.782734	0.162764	-	uncharacterized protein LOC100801123
Glyma.13G041700	0.620668	0.0344413950385	-	ATP-dependent zinc metalloprotease FTSH 11, chloroplastic/mitochondrial
Glyma.10G017500	-0.770888	0.139627	-	uncharacterized protein At5g01610
Glyma.15G176100	0	1	-	LOW QUALITY PROTEIN: hypothetical protein GLYMA_15G176100v4
Glyma.02G286500	0.844247	0.394742	-	glycerol-3-phosphate acyltransferase 1
Glyma.10G185850	0	1	-	hypothetical protein GLYMA_10G185850v4
Glyma.16G160100	0.125856	0.399908	-	uncharacterized protein LOC100789610
Glyma.13G362100	-4.08211	0.0051324151777700005	down	golgin subfamily A member 6-like protein
Glyma.10G176600	0	1	-	isoflavone 7-O-methyltransferase
Glyma.04G216300	-0.315378	0.925411	-	uncharacterized protein LOC100526896
Glyma.17G088900	-1.66321	0.00198791882906	down	Iron-sulfur cluster assembly protein 1-like
Glyma.07G057200	-1.45521	0.142339	-	rhodanese-like domain-containing protein 4, chloroplastic
Glyma.03G120800	-1.41931	7.51732037632e-05	down	Nascent polypeptide-associated complex subunit alpha-like protein
Glyma.07G039700	-4.06862	0.0194279976844	-	putative receptor-like protein kinase At1g72540
Glyma.07G198400	-1.07814	0.10608536604299999	-	uncharacterized protein LOC100527078
Glyma.04G222500	0.8314495652830001	0.159424	-	uncharacterized protein LOC100809314
Glyma.13G059600	9.82079	0.627702	-	hypothetical protein GLYMA_13G059600v4
Glyma.01G211600	-0.365449	0.862229	-	hypothetical protein JHK87_002454
Glyma.12G106900	-3.7465	0.018209923627900002	-	hypothetical protein GYH30_033340
Glyma.01G037400	1.26683	0.0028013613136200002	up	zinc finger MYND domain-containing protein 15
Glyma.08G293900	0.455563	0.10618033536900001	-	phospholipid-transporting ATPase 3
Glyma.10G015400	0	1	-	hypothetical protein GLYMA_10G015400v4
Glyma.02G036700	-1.35463	0.0490236516127	-	protein trichome birefringence-like 2
Glyma.17G122000	1.4889466129700002	0.042669758017699996	-	oleosin G
Glyma.01G229200	-2.78273	0.0007855619985189998	down	hypothetical protein GLYMA_01G229200v4
Glyma.12G028100	1.4247564976499998	0.0026238392263600004	up	pre-mRNA-processing protein 40C isoform X1
Glyma.05G088952	0.38866622963299996	0.564056	-	hypothetical protein GLYMA_05G088952v4
Glyma.07G267001	0.44320142743600005	0.543206	-	hypothetical protein GLYMA_07G267001v4
Glyma.09G053700	-3.80713	0.221687	-	uncharacterized protein LOC100808896 isoform X1
Glyma.19G244800	3.8850933765199995	1.85842713242e-05	up	hypothetical protein GLYMA_19G244800v4
Glyma.13G357100	-1.10432	0.07203460320739999	-	homeobox-leucine zipper protein GLABRA 2
Glyma.14G150300	0.561103	0.0894310883718	-	uncharacterized protein At4g08330, chloroplastic
Glyma.02G106500	-2.9771	0.337676	-	cullin-3A
Glyma.20G099100	-1.29281	0.06974629553839999	-	C2H2-type zinc finger domain-containing protein
Glyma.18G257100	0	1	-	polyvinylalcohol dehydrogenase
Glyma.11G128200	1.87352	0.338322	-	hypothetical protein JHK85_031477
Glyma.08G090850	8.405198205189999	0.627702	-	hypothetical protein GLYMA_08G090850v4
Glyma.01G146300	-0.954706	0.1603	-	probable lactoylglutathione lyase, chloroplastic
Glyma.18G216300	-0.191114	0.8102318882009999	-	flocculation protein FLO11 isoform X1
Glyma.03G014400	2.58173	0.0058399457163	up	(+)-neomenthol dehydrogenase
Glyma.09G026100	-1.53586	0.011328565813100001	-	tubulin beta chain
Glyma.04G096800	-1.23145	0.008209150295930001	down	protein CLT2, chloroplastic
Glyma.10G077600	-0.566239	0.133804	-	ubiquitin-conjugating enzyme E2 variant 1D
Glyma.20G128900	-0.0585958	0.749094	-	reticulon-like protein
Glyma.04G148400	-0.257324	0.782011	-	protein kinase PINOID 2
Glyma.13G031400	0	1	-	protein DOWN-REGULATED IN DIF1 11
Glyma.09G008100	2.2615059235499997	0.000207498639338	up	plastid-lipid-associated protein, chloroplastic
Glyma.15G208700	6.922594312999999	0.5987223871790001	-	protein ENHANCED DISEASE RESISTANCE 2-like
Glyma.06G298400	2.37237	0.000102349590262	up	hypothetical protein GLYMA_06G298400v4
Glyma.10G194000	-3.4417	0.016956199882100002	-	UDP-glycosyltransferase 79A6
Glyma.02G105900	-2.21893	1.17961347815e-05	down	transcription factor TCP15
Glyma.06G282200	-1.37162	0.331337	-	auxin-induced protein X15
Glyma.09G261200	-5.01784	0.000328048717075	down	FT-interacting protein 3
Glyma.09G163600	-2.87356	0.09536304631650001	-	miraculin
Glyma.06G051000	-0.226019	0.7452907423899999	-	uncharacterized protein LOC100527612
Glyma.14G060200	0.258267	0.242994	-	Pleckstrin homology domain-containing protein 1-like
Glyma.06G023400	-0.850486	0.246679	-	uncharacterized protein LOC100802281
Glyma.11G160000	0.418963	0.09907948612430001	-	expansin-A4 precursor
Glyma.16G140400	-0.427132	0.96213	-	hypothetical protein JHK86_045442
Glyma.13G268100	0.721324	0.565363	-	probable LRR receptor-like serine/threonine-protein kinase At3g47570
Glyma.16G094000	-8.6649	0.5101008361899999	-	hypothetical protein GLYMA_16G094000v4
Glyma.10G148100	-0.0795231	0.836496	-	uncharacterized protein LOC100805542 isoform X1
Glyma.13G186100	-14.3298	3.68425113729e-08	down	putative pectinesterase/pectinesterase inhibitor 24
Glyma.19G132500	0	1	-	hypothetical protein GLYMA_19G132500v4
Glyma.03G134100	-1.40963	0.108613	-	UDP-URONIC ACID TRANSPORTER 1
Glyma.16G209900	-0.460467	0.6339964468079999	-	acyl-carrier-protein phosphodiesterase PptH
Glyma.10G121542	0.96812	0.00131237618119	-	protein SMAX1-LIKE 3
Glyma.11G154500	10.9822	0.132332	-	DNA-directed RNA polymerase V subunit 5C
Glyma.14G009600	-0.118817	0.93331	-	cytosolic enolase 3
Glyma.19G144000	-1.6043	0.19119129935499998	-	hypothetical protein GLYMA_19G144000v4
Glyma.07G134000	-0.461749	0.541056	-	protein FAR-RED ELONGATED HYPOCOTYL 1
Glyma.19G168000	1.47141	0.00683144233315	up	plasmodesmata-located protein 1
Glyma.15G149200	-0.22645	0.7786927533419999	-	hypothetical protein GYH30_042415
Glyma.04G166200	0	1	-	hypothetical protein GYH30_010174
Glyma.06G007602	0	1	-	hypothetical protein GLYMA_06G007602v4
Glyma.17G102300	0.6749448564210001	0.027080945308500002	-	pentatricopeptide repeat-containing protein At5g61370, mitochondrial
Glyma.14G110000	-1.01548	0.196015	-	hypothetical protein GYH30_039682
Glyma.03G170900	-4.50943	3.06418432613e-06	down	glycine-rich protein 5
Glyma.17G089932	0	1	-	hypothetical protein GLYMA_17G089932v4
Glyma.03G004300	-2.27239	0.00109128063469	down	dihydrofolate reductase-like
Glyma.12G160300	0.7112691327949999	0.114006	-	uncharacterized protein LOC100790420
Glyma.08G258700	0.18259515460499998	0.39590519837300003	-	importin beta-like SAD2
Glyma.20G239600	-0.465335	0.38096103328599995	-	-
Glyma.08G052150	1.54072	0.479032	-	hypothetical protein GLYMA_08G052150v4
Glyma.08G296700	-0.70814	0.07717197555239999	-	mitochondrial outer membrane protein porin of
Glyma.12G209500	0.534159	0.382916	-	seed biotin-containing protein SBP65
Glyma.02G208800	0.0156713949844	0.7377404143170001	-	VQ motif-containing protein 9
Glyma.15G169100	-0.790669	0.817109	-	xyloglucan endotransglucosylase
Glyma.19G081951	0	1	-	hypothetical protein GLYMA_19G081951v4
Glyma.13G119500	-1.31102	0.0699036	-	CBL-interacting serine/threonine-protein kinase 1
Glyma.05G239800	0	1	-	two-component response regulator ARR14
Glyma.12G172300	1.40459	0.00219833853298	up	uncharacterized protein LOC100817341
Glyma.14G106200	-2.60161	0.049132343042900005	-	hypothetical protein GYH30_039638
Glyma.20G181500	1.23946	0.0269271183733	-	OVARIAN TUMOR DOMAIN-containing deubiquitinating enzyme 9
Glyma.17G063200	-2.38567	0.0005896417556769999	down	histone H4
Glyma.18G153800	-0.286041	0.618411	-	uncharacterized protein At5g65660
Glyma.09G201100	-9.0526	0.515729	-	hypothetical protein GLYMA_09G201100v4
Glyma.16G204900	0.546289	0.0563840532479	-	hypersensitive-induced response protein 4-like
Glyma.20G131600	-0.165073	0.9593214770819999	-	probable E3 ubiquitin-protein ligase RHY1A
Glyma.20G173300	-0.0245829	0.662524	-	Multifunctional methyltransferase subunit TRM112 homolog A-like
Glyma.17G160300	1.50579	0.005136649401420001	up	hypothetical protein GYH30_047448
Glyma.19G111550	12.175285479400001	0.214026	-	hypothetical protein GLYMA_19G111550v4
Glyma.18G105500	0.021010648958999997	0.49175686489299997	-	hypothetical protein JHK86_049769
Glyma.03G040800	0	1	-	hypothetical protein GYH30_006206
Glyma.18G219501	10.1804	0.300422	-	hypothetical protein GYH30_050742
Glyma.04G018100	0.47185877783999997	0.0809202194157	-	pre-rRNA-processing protein TSR1 homolog
Glyma.11G004100	0.401521	0.147108	-	hypothetical protein GLYMA_11G004100v4
Glyma.10G102800	-0.0736862	0.9309660925480001	-	hypothetical protein GLYMA_10G102800v4
Glyma.01G052200	-0.355451	0.584986	-	uncharacterized protein LOC100817240 isoform X2
Glyma.16G203600	0.288423	0.215728	-	probable aminotransferase ACS12
Glyma.04G004900	-1.35157	0.00998500727649	-	glycine-rich protein 2
Glyma.16G018500	-0.98813	0.21438	-	granule-bound starch synthase 1, chloroplastic/amyloplastic
Glyma.01G215700	0.009185989258370001	0.69872	-	DNA-directed RNA polymerase IV subunit 1
Glyma.05G196200	2.00042	0.0008163254784380002	up	hypothetical protein GLYMA_05G196200v4
Glyma.13G029500	0.466252	0.374344	-	linamarin synthase 2
Glyma.17G082900	0	1	-	hypothetical protein GLYMA_17G082900v4
Glyma.06G200000	-0.822477	0.0385642135005	-	hypothetical protein GLYMA_06G200000v4
Glyma.08G302200	-0.847339	0.0537547978115	-	reactive oxygen species modulator 1
Glyma.06G218500	3.72151	0.030729720773800002	-	UDP-N-acetylglucosamine transporter UGNT1
Glyma.10G226000	8.87886	0.39247916784500003	-	transcription factor VIP1
Glyma.01G147900	1.1675043864499999	0.00137777203342	up	pentatricopeptide repeat-containing protein At1g32415, mitochondrial-like
Glyma.16G004100	0.0894458258697	0.876774	-	hypothetical protein GYH30_043712
Glyma.12G146150	13.8999	1.60184431255e-05	up	hypothetical protein GLYMA_12G146150v4
Glyma.13G345600	-1.12343	0.0037827994973	down	60S ribosomal protein L38
Glyma.19G201600	-1.65443	0.026191329289099997	-	fasciclin-like arabinogalactan protein 15
Glyma.17G096600	-0.614724	0.208838	-	putative integral membrane HPP family protein
Glyma.05G154500	-2.16257	0.21149987397599998	-	hypothetical protein JHK87_012977
Glyma.20G025200	0	1	-	L-ascorbate oxidase homolog
Glyma.01G162500	-2.57868	0.000298752075381	down	uncharacterized protein LOC100527729
Glyma.07G155700	-0.863921	0.0294198635454	-	proteasome subunit alpha type-4
Glyma.13G142500	-0.489673	0.394315	-	uncharacterized protein LOC100796414 isoform X1
Glyma.10G088300	8.29424	0.554675	-	hypothetical protein JHK87_027281
Glyma.02G191950	0	1	-	hypothetical protein GLYMA_02G191950v4
Glyma.11G115500	0.700055	0.14107641715299998	-	uncharacterized protein LOC100787385
Glyma.19G164650	0.303289	0.994315	-	hypothetical protein GLYMA_19G164650v4
Glyma.05G153800	-0.506715	0.315028	-	actin-related protein 2/3 complex subunit 4
Glyma.15G256200	-0.968193	0.378208	-	cysteine-rich and transmembrane domain-containing protein WIH1
Glyma.20G171700	0.035063161769800004	0.529937	-	hypothetical protein GLYMA_20G171700v4
Glyma.13G185500	-1.52383	0.252233	-	type I inositol polyphosphate 5-phosphatase 10
Glyma.16G219600	-9.89037	0.09566680364360002	-	hypothetical protein GLYMA_16G219600v4
Glyma.05G246200	1.47516	0.000828542780076	up	ADP,ATP carrier protein ER-ANT1
Glyma.10G279700	-7.34994	0.716587	-	hypothetical protein GYH30_029377
Glyma.04G234200	0	1	-	hypothetical protein GYH30_010868
Glyma.07G080700	0.345281	0.369213	-	putative receptor protein kinase ZmPK1
Glyma.18G266333	0	1	-	hypothetical protein GLYMA_18G266333v4
Glyma.19G034100	0.893519	0.6895379207160001	-	hypothetical protein GYH30_051929
Glyma.08G208800	7.9643	0.589342	-	hypothetical protein JHK86_021983
Glyma.10G105200	0.174594	0.720438	-	triacylglycerol lipase SDP1 isoform X1
Glyma.13G268701	11.169	0.589342	-	hypothetical protein GLYMA_13G268701v4
Glyma.10G192400	0.892285	0.00469155532937	-	hypothetical protein GLYMA_10G192400v4
Glyma.16G082300	0	1	-	hypothetical protein JHK86_044727
Glyma.11G243000	0.07871470059510001	0.552288	-	uncharacterized protein LOC100780085
Glyma.19G169633	0	1	-	hypothetical protein GLYMA_19G169633v4
Glyma.06G178200	-1.61467	0.00430727308965	down	DNA (cytosine-5)-methyltransferase 1
Glyma.13G243100	-0.321776	0.751689	-	60S ribosomal protein L26-1
Glyma.12G162700	-0.352889	0.794756	-	ethylene-responsive transcription factor 4-like
Glyma.10G209000	0.643823	0.030127103699300002	-	pumilio homolog 4 isoform X2
Glyma.02G054701	1.20721	0.631909	-	hypothetical protein GLYMA_02G054701v4
Glyma.07G237700	-1.33296	0.0396869952248	-	galactokinase
Glyma.13G092200	4.56837	8.73192477252e-05	up	hypothetical protein JHK82_035758
Glyma.08G120402	0	1	-	hypothetical protein GLYMA_08G120402v4
Glyma.11G065400	-1.139	0.267921	-	hypothetical protein JHK87_030141
Glyma.12G189400	0.624646	0.024078980954400003	-	J domain-containing protein spf31
Glyma.17G182451	0	1	-	hypothetical protein GLYMA_17G182451v4
Glyma.20G158800	0	1	-	hypothetical protein GLYMA_20G158800v4
Glyma.11G242800	0.94666	0.593472	-	E3 ubiquitin-protein ligase ATL6
Glyma.U031324	-0.623262	0.41625593465099997	-	hypothetical protein GLYMA_U031324v4
Glyma.11G021100	0	1	-	Endoglucanase, partial
Glyma.06G021600	-0.739599	0.0313953403278	-	hypothetical protein GYH30_013840
Glyma.07G164400	-1.1382	0.115515	-	uncharacterized protein LOC114404425
Glyma.06G177800	3.28165	1.2549920858900002e-07	up	C2 and GRAM domain-containing protein At5g50170
Glyma.03G194400	-0.813402	0.108648	-	protein YIPF5 homolog
Glyma.05G203402	5.06683	1.35965850057e-05	up	hypothetical protein GYH30_013269
Glyma.11G193700	1.6033752890000001	0.004843160409460001	up	hypothetical protein GLYMA_11G193700v4
Glyma.03G254200	1.6377358242700002	0.128054	-	hypothetical protein GLYMA_03G254200v4
Glyma.15G216133	0.523632	0.376349	-	hypothetical protein GLYMA_15G216133v4
Glyma.06G123200	7.505758634289999	0.554675	-	WAT1-related protein At1g70260
Glyma.13G217900	-0.200967	0.871133	-	mannosyl-oligosaccharide 1,2-alpha-mannosidase MNS3
Glyma.04G140200	0	1	-	hypothetical protein GLYMA_04G140200v4
Glyma.04G004250	-2.16005	0.0157785885507	-	actin-depolymerizing factor 5
Glyma.12G176450	-2.29834	0.36469037068800003	-	hypothetical protein GLYMA_12G176450v4
Glyma.05G061700	-0.958406	0.0130595953602	-	AIM24 domain-containing protein
Glyma.16G192050	-11.3467	0.12284952662200001	-	hypothetical protein GLYMA_16G192050v4
Glyma.10G030300	0.9370679868649999	0.0369111487445	-	hypothetical protein GYH30_026804
Glyma.13G315500	-0.456153	0.6361695619609999	-	uncharacterized protein LOC100795891
Glyma.13G041800	2.26593	6.21187808111e-06	up	abscisic acid receptor PYL8
Glyma.12G086300	-0.262582	0.9195370938519999	-	hypothetical protein GLYMA_12G086300v4
Glyma.03G136000	1.19184	0.0494583839666	-	hypothetical protein GLYMA_03G136000v4
Glyma.09G269000	0.819225	0.025336661693599997	-	protein cornichon homolog 4
Glyma.10G086100	0	1	-	hypothetical protein GYH30_027392
Glyma.05G016000	-2.33637	0.0615603576444	-	calcium sensing receptor, chloroplastic isoform X2
Glyma.07G195700	1.4011	0.00037111741567000007	up	endonuclease MutS2
Glyma.01G068000	0.137402	0.473701	-	hypothetical protein GLYMA_01G068000v4
Glyma.03G232800	-0.0554327	0.6877910199420001	-	importin subunit alpha-2
Glyma.17G241000	0.431545	0.14994	-	transcription factor ALC isoform X1
Glyma.05G114600	0	1	-	hypothetical protein JHK85_013015
Glyma.02G215300	3.0289	2.96689823391e-07	up	hypothetical protein JHK86_005011
Glyma.03G174500	1.52614	0.0230632592907	-	hypothetical protein JHK85_008000
Glyma.13G067650	0.19244744893399998	0.575047	-	hypothetical protein GLYMA_13G067650v4
Glyma.01G089000	0.200737	0.428309	-	uncharacterized protein LOC100500643
Glyma.13G152882	0.622166	0.0351153794116	-	transcription initiation factor TFIID subunit 12
Glyma.13G171300	-0.930907	0.153037	-	GDSL esterase/lipase At5g45920
Glyma.01G102300	0.646637	0.240194	-	uncharacterized protein LOC100305924
Glyma.13G300600	2.9744215835900003	0.158208	-	QWRF motif-containing protein 3
Glyma.18G213400	-0.360463	0.522914	-	vacuolar-sorting receptor 1
Glyma.08G234900	-2.6345	0.000290720839504	down	hypothetical protein GYH30_022170
Glyma.16G043000	0	1	-	ricin B-like lectin R40G3
Glyma.12G233400	-1.72463	0.0601368	-	protein trichome birefringence-like 41
Glyma.09G194500	0	1	-	histone-lysine N-methyltransferase, H3 lysine-9 specific SUVH4-like
Glyma.09G222400	0.376356	0.23111027433200002	-	2-(3-amino-3-carboxypropyl)histidine synthase subunit 1
Glyma.04G103933	0	1	-	hypothetical protein GLYMA_04G103933v4
Glyma.11G086300	2.27585	0.031051883879900002	-	LOW QUALITY PROTEIN: DNA mismatch repair
Glyma.04G027000	-1.89714	0.17711423403499998	-	B-box zinc finger protein 21 isoform
Glyma.02G015500	-0.973328	0.0665039662031	-	kinesin-like protein KIN-14I
Glyma.07G051100	0	1	-	hypothetical protein JHK85_018035
Glyma.03G073251	-1.99497	0.7060227801119999	-	hypothetical protein GLYMA_03G073251v4
Glyma.09G011900	-1.06968	0.044348604745899994	-	uncharacterized protein LOC100306111
Glyma.07G171900	-6.98831	0.695369	-	hypothetical protein JHK85_019377
Glyma.14G078800	-0.925837	0.22329626144200002	-	inactive protein kinase SELMODRAFT_444075 isoform X2
Glyma.04G225300	-2.12788	0.577149	-	hypothetical protein GLYMA_04G225300v4
Glyma.06G281800	0	1	-	auxin-induced protein 6B
Glyma.11G090200	-1.73861	0.0016374128074700001	down	ABC transporter G family member 14
Glyma.10G152400	-0.763487	0.35802682457699997	-	hypothetical protein JHK86_028370
Glyma.11G008800	0.374095	0.40831981687200003	-	pentatricopeptide repeat-containing protein At5g13270, chloroplastic isoform
Glyma.15G061050	0	1	-	hypothetical protein GLYMA_15G061050v4
Glyma.07G264300	0.007022565398359999	0.5965499829600001	-	protein CLMP1
Glyma.05G043500	-4.0009	0.00226696139017	down	protein JINGUBANG
Glyma.18G165700	-1.70824	0.624341	-	xyloglucan endotransglucosylase/hydrolase protein 2
Glyma.11G076200	3.1706635573299997	0.0666556088079	-	auxin-responsive protein SAUR50
Glyma.07G212900	0.135922	0.40181649787600004	-	glycoprotein 3-alpha-L-fucosyltransferase A
Glyma.07G096800	-8.36367	0.716587	-	chlorophyllase-2
Glyma.18G190100	-0.346078	0.674673	-	hypothetical protein JHK86_050813
Glyma.07G245500	1.15417	0.0211333731757	-	hypothetical protein JHK87_019624
Glyma.10G128866	8.5448	0.214458	-	receptor-like protein EIX2
Glyma.05G075700	0	1	-	hypothetical protein JHK87_012013
Glyma.10G204600	0.338061	0.44407547051000007	-	uncharacterized protein LOC100795632
Glyma.11G160484	-0.104774	0.905327	-	protein RETICULATA-RELATED 4, chloroplastic
Glyma.02G214000	0	1	-	hypothetical protein GYH30_004775
Glyma.08G008400	0.357616	0.154098	-	chaperone protein ClpC, chloroplastic
Glyma.16G168400	0.8245766118250001	0.0180321486631	-	transcription factor VIP1
Glyma.19G036700	-7.90751	0.716587	-	GDSL esterase/lipase 7
Glyma.20G170000	0.346421	0.288477	-	protein GIGANTEA
Glyma.06G214400	0.0773354519467	0.9269666114049999	-	uncharacterized protein LOC100526882
Glyma.02G174400	-0.372959	0.600706	-	uncharacterized protein LOC100817993
Glyma.16G029500	-0.415808	0.628547	-	eukaryotic translation initiation factor 1A
Glyma.12G172500	-0.970308	0.0442735	-	putative aquaporin PIP2-5
Glyma.09G176600	-0.187605	0.9307835495610001	-	putative pentatricopeptide repeat-containing protein At1g12700, mitochondrial
Glyma.07G241300	-0.00718711	0.5938462224759999	-	zinc finger CCHC domain-containing protein
Glyma.13G061900	-1.54264	0.0740405175781	-	transcription factor MYB106
Glyma.04G176300	-1.00535	0.809302	-	uncharacterized protein LOC100815720
Glyma.10G148000	-0.0448558	0.703126	-	pentatricopeptide repeat-containing protein At1g09190
Glyma.17G205200	0.6207356479039999	0.8471620899529999	-	hypothetical protein GLYMA_17G205200v4
Glyma.16G102000	0.0694468252058	0.917105	-	zinc finger protein ZAT1
Glyma.03G259900	8.58554	0.627702	-	hypothetical protein JHK87_008430
Glyma.16G192800	-1.08061	0.531065	-	hypothetical protein GLYMA_16G192800v4
Glyma.11G150243	-1.81382	0.004773633933939999	down	ascorbate peroxidase 1, cytosolic
Glyma.13G183500	-2.35579	0.255377	-	polyphenol oxidase A1, chloroplastic
Glyma.01G005200	1.5468326763299998	0.000364417331644	up	glutathione hydrolase 3 isoform X2
Glyma.11G164200	0	1	-	hypothetical protein GYH30_031447
Glyma.05G136500	0.942861	0.044639347267300004	-	hypothetical protein GLYMA_05G136500v4
Glyma.03G117700	-1.45585	0.198562	-	metalloendoproteinase 4-MMP
Glyma.10G247850	0.591339	0.572789	-	hypothetical protein GLYMA_10G247850v4
Glyma.18G077000	-6.02776	1.26372051071e-07	down	lysine-rich arabinogalactan protein 19
Glyma.06G003100	-0.718217	0.378219	-	uncharacterized protein LOC102665955 isoform X1
Glyma.02G309500	-0.328643	0.633963	-	chlorophyll a-b binding protein 8, chloroplastic
Glyma.03G058200	-0.779225	0.0910987190704	-	uncharacterized protein LOC100803961
Glyma.13G228350	0	1	-	hypothetical protein GLYMA_13G228350v4
Glyma.13G313901	0	1	-	hypothetical protein GLYMA_13G313901v4
Glyma.14G105001	-7.49169	0.695369	-	hypothetical protein GLYMA_14G105001v4
Glyma.16G016600	-0.113614	0.939213	-	NAC domain-containing protein 76
Glyma.18G046300	-3.52649	0.005529244307479999	down	cysteine-rich receptor-like protein kinase 2
Glyma.15G257200	0	1	-	hypothetical protein GLYMA_15G257200v4
Glyma.07G091000	-0.877234	0.145488	-	hypothetical protein GYH30_017847
Glyma.15G248500	0.396844	0.371732	-	hypothetical protein GLYMA_15G248500v4
Glyma.03G238400	0.0898904333385	0.7229322325570001	-	protein YIPF1 homolog
Glyma.20G022400	-0.664264	0.324293	-	BOI-related E3 ubiquitin-protein ligase 1
Glyma.07G004600	1.9948061257700003	0.0399568172106	-	proline-rich receptor-like protein kinase PERK15 isoform
Glyma.11G138600	0.6238386446649999	0.056724140249899996	-	scarecrow-like protein 14
Glyma.05G214500	0	1	-	stellacyanin
Glyma.06G300000	0	1	-	transcription factor MYB58
Glyma.07G013800	-0.757609	0.228237	-	hypothetical protein GLYMA_07G013800v4
Glyma.16G179900	-0.0935027	0.741431	-	scarecrow-like protein 8
Glyma.06G046300	0.0641995332446	0.4838	-	interferon-related developmental regulator 1
Glyma.02G189900	0.497347	0.7527074435590001	-	hypothetical protein JHK87_004562
Glyma.17G007500	1.11226	0.15317	-	hypothetical protein GLYMA_17G007500v4
Glyma.10G134400	0	1	-	uncharacterized protein LOC100807304
Glyma.01G155000	0.0716985788925	0.570711	-	pentatricopeptide repeat-containing protein At1g31790
Glyma.12G007100	-13.0659	9.59502607578e-05	down	hypothetical protein GYH30_032306
Glyma.19G096000	1.78797	0.45711918666900003	-	hypothetical protein GLYMA_19G096000v4
Glyma.15G020700	-2.50188	0.0382049114674	-	profilin-4
Glyma.02G310500	0.778135	0.613714	-	hypothetical protein GLYMA_02G310500v4
Glyma.01G241600	0.16540600396400001	0.312688	-	thymocyte nuclear protein 1
Glyma.07G266900	1.13063	0.00232648890188	up	protein NAR1 isoform X2
Glyma.16G010200	-0.0141593	0.691737	-	Protein FLUORESCENT IN BLUE LIGHT, chloroplastic-like
Glyma.02G250400	-1.7974	0.005367545031100001	down	probable methyltransferase PMT11
Glyma.12G119100	0	1	-	hypothetical protein GLYMA_12G119100v4
Glyma.09G112900	0	1	-	hypothetical protein GLYMA_09G112900v4
Glyma.07G090400	3.4485875137599997	0.009067061035959998	-	protein MAT1
Glyma.10G268400	2.00299	0.155647	-	hypothetical protein GYH30_029254
Glyma.05G210300	-1.04037	0.25860850327199997	-	homeobox protein BEL1 homolog
Glyma.05G138267	-2.35614	0.023424313248900003	-	hypothetical protein GYH30_012592
Glyma.02G111100	5.07449	0.000133389853511	up	hypothetical protein JHK87_003659
Glyma.17G013400	-3.86123	0.0005680714393869999	down	uncharacterized protein LOC100811239
Glyma.01G072450	-0.189857	0.9595834675079999	-	hypothetical protein GLYMA_01G072450v4
Glyma.03G215600	-1.06342	0.144542	-	histone-lysine N-methyltransferase ATX3 isoform X1
Glyma.20G147500	2.509	0.0143572391483	-	hypothetical protein GYH30_055891
Glyma.14G205200	-0.94409	0.20555841234900002	-	trans-cinnamate 4-monooxygenase
Glyma.15G109100	-3.34991	0.07434364967450001	-	putative Myb family transcription factor At1g14600
Glyma.17G001600	0.130652	0.6878987406620001	-	hypothetical protein GYH30_045783
Glyma.12G168900	-0.162919	0.914717	-	Cleavage and polyadenylation specificity factor subunit
Glyma.20G246600	3.1002	0.00908399848842	-	-
Glyma.05G204400	0.351157	0.0885949764048	-	uncharacterized protein LOC100805083
Glyma.08G316700	2.6955887143400004	7.38126255335e-06	up	protein translation factor SUI1 homolog 2
Glyma.08G158700	-10.5104	0.11380280158299999	-	nuA4 complex subunit EAF3 homolog
Glyma.16G166400	0	1	-	hypothetical protein GLYMA_16G166400v4
Glyma.16G141600	0	1	-	hypothetical protein GYH30_045069
Glyma.13G328100	0.340537	0.123394	-	hypothetical protein GLYMA_13G328100v4
Glyma.11G012700	-0.848879	0.277561	-	uncharacterized protein LOC100816088
Glyma.09G227001	0.760812	0.0804606845043	-	hypothetical protein GLYMA_09G227001v4
Glyma.20G083800	-1.97273	5.03846688516e-05	down	histone H4
Glyma.05G054200	0.9003433834100001	0.00398187325448	-	AT-hook motif nuclear-localized protein 24
Glyma.03G203400	-9.22525	0.5197130358690001	-	RING-H2 finger protein ATL70
Glyma.02G290800	-2.08301	0.00068571004665	down	Peptide methionine sulfoxide reductase-like
Glyma.19G020700	0.0500900302032	0.531643	-	aldose 1-epimerase-like
Glyma.04G237000	-0.254558	0.733131	-	phosphomevalonate kinase, peroxisomal isoform X2
Glyma.03G228300	-0.0135564	0.5761873726100001	-	probable L-cysteine desulfhydrase, chloroplastic
Glyma.02G088600	0.314203	0.582893	-	uncharacterized protein LOC114384851
Glyma.12G178600	0.7854805848890001	0.0639481712485	-	hypothetical protein GLYMA_12G178600v4
Glyma.12G173500	0.9078302266949999	0.127669	-	BTB domain and kelch-repeat-containing protein isoform
Glyma.15G151300	0.12441895406199999	0.787107	-	hypothetical protein JHK84_042658
Glyma.07G244600	-1.18184	0.09589065040969999	-	uncharacterized protein LOC100527697
Glyma.14G170200	0	1	-	hypothetical protein GYH30_040322
Glyma.18G273500	0	1	-	agamous-like MADS-box protein MADS2 isoform X1
Glyma.17G204000	0.982947	0.011425	-	protein TIC236, chloroplastic-like isoform X1
Glyma.04G104800	-1.76283	0.020276907134499998	-	FCS-like zinc-finger domain-containing protein isoform 1
Glyma.16G038600	-0.382755	0.711945	-	alpha-crystallin domain-containing protein
Glyma.17G077200	-0.585252	0.529557	-	hypothetical protein JHK87_046563
Glyma.13G187800	-0.426649	0.379793	-	SAC3 family protein C isoform X1
Glyma.03G248500	1.5170790670899998	0.00358828800157	up	probable aldo-keto reductase 1
Glyma.16G084000	1.83009	0.00592189432153	up	hypothetical protein JHK86_044750
Glyma.12G230100	0.217975	0.665941	-	hypothetical protein JHK85_035466
Glyma.13G197200	1.23876	0.0032463791395999997	up	protein LONG AFTER FAR-RED 3 isoform
Glyma.14G216800	0.0432010595551	0.492915	-	putative 1-acylglycerol-3-phosphate O-acyltransferase
Glyma.06G124800	-1.04719	0.029527414295799997	-	uncharacterized protein LOC100810423
Glyma.07G052400	0.0545558976987	0.6276428693339999	-	cytochrome b5-like
Glyma.08G145400	-0.00578549	0.561137	-	RNA-binding protein 39 isoform X2
Glyma.08G184300	-1.41499	1.24840127882e-06	down	ribosomal protein L10 family protein
Glyma.13G230700	0	1	-	F-box protein At3g56470
Glyma.15G101500	-0.288779	0.574225	-	protein FAR1-RELATED SEQUENCE 7
Glyma.12G165900	0.158366	0.12214922134600001	-	regulator of nonsense transcripts UPF3
Glyma.19G089200	-1.7878	0.06596828882149999	-	uncharacterized protein LOC100305865 precursor
Glyma.11G165502	0	1	-	hypothetical protein GLYMA_11G165502v4
Glyma.04G228800	-0.0519155	0.7276207552799999	-	uncharacterized protein LOC113001460
Glyma.13G316400	-0.52191	0.19488363419799998	-	60S ribosomal protein L10a
Glyma.08G040500	0.11411548238199999	0.389251	-	DENN domain and WD repeat-containing protein
Glyma.10G161900	-2.91955	0.308455	-	calmodulin-like protein 8
Glyma.06G143700	-5.45291	1.9681105949e-05	down	uncharacterized protein LOC100783000
Glyma.14G040100	1.31209	0.00198786807854	up	hypothetical protein JHK87_038711
Glyma.12G162600	-1.28034	0.516446	-	hypothetical protein GYH30_033939
Glyma.11G084400	-1.44778	0.00447532837829	down	phosphoserine aminotransferase 1, chloroplastic
Glyma.11G187800	0.31466365536400004	0.0625957	-	histone deacetylase 9 isoform X3
Glyma.04G145100	-1.71785	0.0601403478229	-	protein MIZU-KUSSEI 1
Glyma.15G005000	-1.40105	0.0728499686393	-	transcription factor bHLH25 isoform X1
Glyma.16G188251	0	1	-	hypothetical protein GLYMA_16G188251v4
Glyma.03G145800	-1.39099	0.005562220915840001	down	homeobox-leucine zipper protein HOX11
Glyma.13G097700	0	1	-	hypothetical protein JHK86_035947
Glyma.13G114800	-0.594229	0.277905	-	1-phosphatidylinositol-3-phosphate 5-kinase FAB1B
Glyma.01G023600	0.137979	0.468802	-	kinesin-like protein KIN-14B isoform X1
Glyma.10G103200	0	1	-	polygalacturonase
Glyma.10G077900	-1.80145	0.11108273788100001	-	putative HVA22-like protein g
Glyma.18G244500	-0.369433	0.6046779397609999	-	phospholipase A(1) LCAT3
Glyma.18G218500	1.09551	0.28930137110599996	-	cytochrome P450 714A1
Glyma.07G263600	-0.682175	0.401717	-	KNT1
Glyma.09G256800	-1.57539	0.115817	-	brassinosteroid-responsive RING protein 1
Glyma.13G037300	-0.0102691	0.8612418783879999	-	small RNA degrading nuclease 5 isoform
Glyma.07G232000	0.0768184005991	0.291547	-	phospholipase A2 family protein
Glyma.12G032300	-0.240757	0.6609901373789999	-	peroxisomal ascorbate peroxidase
Glyma.10G155900	-11.6327	0.038198	-	nuclear transcription factor Y subunit C-3
Glyma.06G082600	0.09996802255489999	0.407277	-	uncharacterized protein LOC114415121
Glyma.05G163700	0.43057690520900005	0.149648	-	exonuclease 1 isoform X2
Glyma.05G215600	1.14591	0.00649197247429	up	putative GABA transporter
Glyma.02G183700	-7.18534	0.683558	-	protein HASTY 1
Glyma.01G055000	1.3534789973299999	0.201641	-	hypothetical protein GLYMA_01G055000v4
Glyma.01G095200	0.251027	0.984771	-	hypothetical protein JHK87_001113
Glyma.05G156100	-1.26012	0.00162549829104	down	60S ribosomal protein L32-1
Glyma.18G070900	-0.646486	0.27500272637699996	-	uncharacterized protein ycf20
Glyma.07G159100	-12.9343	3.85400591639e-05	down	uncharacterized protein LOC100815805
Glyma.12G024300	0.6887295066779999	0.557225	-	hypothetical protein JHK87_032538
Glyma.12G196600	-3.4643	0.0011135927944300001	down	uclacyanin 1
Glyma.03G259400	-2.08494	0.022553589290299998	-	uncharacterized protein LOC114407826
Glyma.02G058800	0.297689	0.07285154998480001	-	bZIP transcription factor bZIP115
Glyma.11G041800	0.232228	0.149268	-	uncharacterized protein LOC114376300
Glyma.11G222150	-0.0639492	0.984079	-	hypothetical protein GLYMA_11G222150v4
Glyma.09G208600	0	1	-	hypothetical protein GLYMA_09G208600v4
Glyma.06G086800	-0.420838	0.6350334749759999	-	leucine-rich repeat receptor-like serine/threonine-protein kinase SKM1
Glyma.09G227500	-0.104621	0.808184	-	polyamine oxidase 1
Glyma.07G035500	-8.94923	0.35862246179799995	-	U-box domain-containing protein 35
Glyma.03G037400	-0.293641	0.775511	-	hypothetical protein GLYMA_03G037400v4
Glyma.16G222000	-0.547382	0.252756	-	nuclear intron maturase 3, mitochondrial-like
Glyma.04G051600	-0.923214	0.146284	-	NDR1/HIN1-like protein 13
Glyma.11G094000	-0.715805	0.0826360455967	-	uncharacterized protein LOC100808749
Glyma.11G029600	0.368635	0.232625	-	SNARE-interacting protein KEULE isoform X1
Glyma.09G052200	0.702931	0.017980872114599998	-	histone-lysine N-methyltransferase ATXR7 isoform X1
Glyma.12G135000	2.96118	5.46362264044e-06	up	thiamin biosynthetic enzyme
Glyma.19G123900	-0.457862	0.39897671848899996	-	probable protein S-acyltransferase 4
Glyma.19G126400	-3.9116	4.6417726605e-07	down	WAT1-related protein At5g07050
Glyma.19G148500	0.0509585981793	0.867542	-	hypothetical protein JHK87_053571
Glyma.04G192900	0.8527649065590001	0.00719414511145	-	elongator complex protein 3
Glyma.11G143700	-0.0133383	0.96213	-	hypothetical protein GLYMA_11G143700v4
Glyma.08G349500	0.268765	0.20671	-	RIN4d protein
Glyma.08G038800	-0.616624	0.6458147384480001	-	putative protein TPRXL
Glyma.15G138300	0.9603949539769999	0.302775	-	hypothetical protein GYH30_042301
Glyma.19G124500	0.427286	0.09115922217219999	-	alpha-L-arabinofuranosidase 1
Glyma.16G180300	-2.95624	0.00224364212122	down	protein SRC2-like
Glyma.06G102000	-0.496437	0.8601839831899999	-	protein PHOSPHATE-INDUCED 1
Glyma.12G183600	1.06798	0.0631130224633	-	pentatricopeptide repeat-containing protein At2g27610
Glyma.13G329100	-0.168292	0.8461090600900001	-	V-type proton ATPase subunit a1
Glyma.17G140651	0.29938582963000004	0.030450764396199998	-	hypothetical protein GLYMA_17G140651v4
Glyma.20G134800	0	1	-	hypothetical protein JHK86_056156
Glyma.18G179700	0	1	-	hypothetical protein GYH30_050333
Glyma.11G190200	-1.29129	0.0333586252657	-	hypothetical protein GLYMA_11G190200v4
Glyma.03G065400	1.3715482997100001	0.21965695859499998	-	hypothetical protein JHK85_006719
Glyma.17G211100	-0.461164	0.266969	-	protein WVD2-like 5 isoform X1
Glyma.15G117700	0	1	-	hypothetical protein JHK87_042008
Glyma.09G017600	-0.728268	0.21908758073600001	-	uncharacterized protein At3g52155, chloroplastic
Glyma.05G084300	0.37562073989600003	0.0535514447435	-	uncharacterized protein LOC100794305
Glyma.07G012400	1.7330942110499998	0.000971622525409	up	dentin sialophosphoprotein
Glyma.01G120800	-0.667755	0.37957305334799996	-	uncharacterized protein LOC102668485
Glyma.13G325700	-0.0359794	0.8305408367820001	-	vacuolar fusion protein MON1 homolog
Glyma.08G036600	-4.52619	1.07454827823e-05	down	embryonic abundant protein USP92
Glyma.02G073100	0.5148089375630001	0.0427982188887	-	septin and tuftelin-interacting protein 1 homolog
Glyma.15G039000	-0.890691	0.641305	-	uncharacterized protein At3g17950
Glyma.20G084100	-0.0299892	0.649093	-	uncharacterized TPR repeat-containing protein At1g05150
Glyma.17G189000	0	1	-	hypothetical protein JHK86_047964
Glyma.11G136100	0.726452	0.0306127367901	-	transcription initiation factor IIA large subunit
Glyma.17G143300	1.22017	0.00587641816384	up	E3 ubiquitin ligase PQT3-like
Glyma.05G152700	9.32145	0.554675	-	hypothetical protein GYH30_012750
Glyma.13G370800	-0.925717	0.11636212763800001	-	pentatricopeptide repeat-containing protein At1g80880, mitochondrial
Glyma.11G233500	-5.21075	3.5048504040599998e-06	down	probably inactive leucine-rich repeat receptor-like protein
Glyma.01G123300	-0.0153033	0.622963	-	BAG and ubiquitin domain-containing protein
Glyma.16G142300	1.6557367448500002	0.00059719678648	up	lysosomal amino acid transporter 1 isoform
Glyma.09G149400	-1.9924	0.018546470357599997	-	carboxylesterase 1
Glyma.20G228200	-0.961083	0.0327559377806	-	-
Glyma.19G061200	-0.176414	0.875731	-	monodehydroascorbate reductase 4, peroxisomal
Glyma.16G195200	0	1	-	unknown
Glyma.14G176500	-3.66759	8.43364558281e-08	down	protein EXORDIUM-like 2
Glyma.11G146800	-1.39346	0.0009109038439580001	down	protein disulfide isomerase-like 1-4
Glyma.03G249600	-0.71968	0.09681129801789999	-	uncharacterized protein LOC100802211
Glyma.06G103900	-10.1859	0.026476538066699997	-	sugar transport protein 5
Glyma.14G111300	-1.78916	0.06549598825130001	-	deSI-like protein At4g17486 isoform X1
Glyma.03G255500	-4.92787	0.0010443445131400001	down	hypothetical protein JHK86_008538
Glyma.06G020500	-0.253945	0.713824	-	hypothetical protein GYH30_013828
Glyma.17G230700	0.750615	0.0431777601767	-	hypothetical protein GYH30_048207
Glyma.19G199051	-2.65237	0.11520536688300001	-	hypothetical protein GLYMA_19G199051v4
Glyma.18G078600	0.155778	0.493416	-	zinc transporter 11 isoform X1
Glyma.02G041500	-0.313896	0.925479	-	MADS-box protein JOINTLESS-like isoform X2
Glyma.17G205300	-5.48764	6.19841728372e-06	down	gibberellin 3-beta-dioxygenase 1
Glyma.12G030700	2.3699	0.0332450446604	-	chaperone protein dnaJ 11-like protein
Glyma.04G217600	0	1	-	uncharacterized protein LOC106798674
Glyma.09G127900	0.442134	0.6245998971019999	-	stress-response A/B barrel domain-containing protein At5g22580-like
Glyma.19G262900	-0.188138	0.909423	-	GDSL esterase/lipase 5 isoform X2
Glyma.07G181700	-0.706044	0.415278	-	guanosine nucleotide diphosphate dissociation inhibitor At5g09550
Glyma.07G225500	0.854121	0.0286815795791	-	hypothetical protein JHK85_019982
Glyma.05G158000	-2.02532	0.0113754384174	-	uncharacterized protein LOC100790076 isoform X3
Glyma.15G209700	0	1	-	hypothetical protein GmHk_15G044621
Glyma.02G096800	-0.515698	0.233483	-	glucose-6-phosphate 1-dehydrogenase, chloroplastic
Glyma.15G119800	0	1	-	hydrophobic seed protein-like
Glyma.09G239500	-3.1816	0.05615200618940001	-	hypothetical protein GYH30_026007
Glyma.12G239600	0.8268628029970001	0.0445851778891	-	FT-interacting protein 1
Glyma.12G045000	-0.481697	0.32174	-	arabinosyltransferase RRA2
Glyma.06G188600	-0.150304	0.940143	-	DDT domain-containing protein DDR4
Glyma.08G365500	0.499934	0.043360401835400006	-	uncharacterized protein LOC100814060
Glyma.05G142101	-8.15343	0.504614	-	hypothetical protein GLYMA_05G142101v4
Glyma.15G100600	0.10563311645300001	0.515228	-	uncharacterized protein LOC100778194
Glyma.05G244100	0.833018	0.364761	-	phosphatidyl ethanolamine-binding family protein MFT precursor
Glyma.05G069000	0.20611691230999998	0.415708	-	pentatricopeptide repeat-containing protein At1g08070, chloroplastic
Glyma.02G034051	1.6782442657499999	0.00143222068804	up	hypothetical protein GLYMA_02G034051v4
Glyma.06G017100	-0.790255	0.005175693193819999	-	HMG1/2-like protein
Glyma.02G078100	0.820443	0.00628545939496	-	DEAD-box ATP-dependent RNA helicase 39
Glyma.04G043350	-2.29561	0.0167234	-	hypothetical protein GLYMA_04G043350v4
Glyma.08G288500	-0.910112	0.340771	-	potassium transporter 6 isoform X1
Glyma.07G042300	-0.695203	0.6872976335619999	-	hypothetical protein JHK87_017451
Glyma.05G032800	3.09503	0.0603349751851	-	hypothetical protein JHK85_011991
Glyma.20G168700	-0.819662	0.8781575152600001	-	uncharacterized protein LOC100802772
Glyma.17G137200	-0.166935	0.979008	-	probable sugar phosphate/phosphate translocator At1g12500
Glyma.09G190500	-0.401665	0.269961	-	kinesin-like protein KIN-13B isoform X2
Glyma.08G129900	-0.55947	0.229728	-	DNA damage-binding protein 1a
Glyma.06G012500	-0.746874	0.295977	-	3-ketoacyl-CoA synthase 4
Glyma.13G096000	-0.228807	0.7879929153640001	-	uncharacterized protein LOC100790270 isoform X1
Glyma.06G009100	-1.59246	0.312196	-	B-box zinc finger protein 20 isoform
Glyma.05G031300	-0.351158	0.454675	-	DDT domain-containing protein DDR4
Glyma.03G076900	0.376028	0.0706187694889	-	protein DEFECTIVE IN EXINE FORMATION 1
Glyma.06G039800	-3.88966	2.50947249585e-06	down	protein CYPRO4
Glyma.17G164651	-1.16497	0.325731	-	hypothetical protein GLYMA_17G164651v4
Glyma.06G299100	-0.816611	0.100741	-	protein THYLAKOID FORMATION1, chloroplastic
Glyma.17G197200	1.34955	0.00020864423088099996	up	GRIP and coiled-coil domain-containing protein 2
Glyma.08G325200	-4.08494	0.00016034554142	down	kinesin-like protein KIN-12F
Glyma.18G225850	3.42199	0.530161	-	probable RNA-binding protein 19
Glyma.14G075200	2.0081	7.098438741439999e-06	up	uncharacterized protein LOC100801396
Glyma.06G034500	-0.471406	0.407827	-	E3 ubiquitin-protein ligase RNF5
Glyma.18G073400	-1.13691	0.019212055525900003	-	uridine kinase-like protein
Glyma.03G184450	0	1	-	hypothetical protein GLYMA_03G184450v4
Glyma.18G034200	-1.12954	0.056879531349800005	-	folylpolyglutamate synthase isoform X1
Glyma.09G219100	-8.60344	0.716587	-	auxin-induced protein 10A5-like
Glyma.15G181600	-2.36088	0.000201726501738	down	pectinesterase inhibitor 3
Glyma.07G076100	-1.62464	0.172171	-	BON1-associated protein 2
Glyma.06G280200	0	1	-	hypothetical protein GYH30_016490
Glyma.08G049651	-0.310495	0.905121	-	hypothetical protein GLYMA_08G049651v4
Glyma.13G323200	-1.35133	0.0192963	-	ABC transporter F family member 1
Glyma.04G196000	-14.7402	1.0100550225e-09	down	uncharacterized protein LOC100782782
Glyma.14G036700	-0.640843	0.305044	-	uncharacterized protein LOC100305615
Glyma.18G005600	-1.53476	0.0403671296854	-	squamosa promoter-binding-like protein 12
Glyma.13G066100	-1.23979	0.0391081961664	-	AAA-ATPase ASD, mitochondrial
Glyma.02G064300	1.0782	0.516504	-	ribonuclease 1
Glyma.08G362200	0.124584	0.448585	-	2,3-dimethylmalate lyase isoform X1
Glyma.10G175050	0	1	-	hypothetical protein GLYMA_10G175050v4
Glyma.09G001000	-0.299128	0.8307557593870001	-	splicing factor 3B subunit 4
Glyma.20G103400	0.524553	0.0706808784067	-	transcription factor TCP7
Glyma.03G034900	-0.151298	0.9695679555969999	-	putative disease resistance protein At3g14460
Glyma.19G034400	-12.2054	0.00845625157644	down	hypothetical protein JHK86_052199
Glyma.02G259100	-0.198818	0.919977	-	WEB family protein At2g40480
Glyma.06G266700	-3.15286	0.155208	-	Thioredoxin-like protein CXXS1-like
Glyma.16G078000	0	1	-	hypothetical protein JHK86_044680
Glyma.05G076300	-0.756648	0.128168	-	uncharacterized protein LOC100306206
Glyma.13G223900	-0.440431	0.397274	-	MACPF domain-containing protein CAD1
Glyma.13G036800	1.2973947724500001	0.15061768980999998	-	hypothetical protein GLYMA_13G036800v4
Glyma.06G053400	2.85033	0.00492249013234	up	hypothetical protein JHK87_014347
Glyma.02G141000	-0.0661279	0.788103	-	WRKY transcription factor 22
Glyma.01G141000	0	1	-	hypothetical protein GYH30_001529
Glyma.07G160900	1.19667	0.477902	-	hypothetical protein JHK85_019205
Glyma.02G001300	0.217586	0.18727	-	uncharacterized protein LOC100500641
Glyma.09G241900	-1.01114	0.141926	-	uncharacterized protein LOC102664801
Glyma.10G196300	-0.421033	0.40703	-	protein SMAX1-LIKE 3
Glyma.16G031000	-1.17714	0.205362	-	late embryogenesis abundant protein
Glyma.05G038500	0	1	-	transcription factor MYB98
Glyma.10G049600	-1.40768	0.14507568810799998	-	interactor of constitutive active ROPs 2,
Glyma.11G130700	0.134144	0.485358	-	IRK-interacting protein
Glyma.17G039800	0.44314262208899996	0.126034	-	Pti1 kinase-like protein
Glyma.14G013000	0	1	-	protein NOI4
Glyma.06G137500	0.505315	0.47354426096999996	-	hypothetical protein JHK85_015596
Glyma.04G028600	-2.0498	0.0265714962051	-	beta-galactosidase 5
Glyma.10G287200	-0.845379	0.327219	-	GEM-like protein 4
Glyma.11G100600	3.94861	0.00012716195860700002	up	uncharacterized protein LOC102666792 isoform X1
Glyma.20G009000	-1.19396	0.186523	-	uncharacterized protein LOC100794800
Glyma.13G327000	-1.17834	0.182224	-	beta-galactosidase 8
Glyma.13G328600	-0.812417	0.155321	-	carbamoyl-phosphate synthase large chain, chloroplastic
Glyma.11G073600	-0.150361	0.9275117977320001	-	Probable ubiquitin-conjugating enzyme E2 16-like
Glyma.10G203900	2.19948	7.87698004242e-05	up	hypothetical protein GYH30_028593
Glyma.16G195600	-2.07393	0.0536339	-	cytochrome P450 736A117
Glyma.11G240100	1.6435069818599999	0.0008908807915449999	up	TLD domain-containing protein 2
Glyma.01G223100	0.04651517717899999	0.906701	-	uncharacterized protein LOC114425145 isoform X1
Glyma.12G024500	-1.16811	0.00212089111121	down	Translocon-associated protein subunit alpha-like precursor
Glyma.09G147000	0	1	-	hypothetical protein GLYMA_09G147000v4
Glyma.18G235500	-3.04851	0.170961	-	delta-like protein B
Glyma.07G137300	-2.39869	0.0483937881123	-	delta-1-pyrroline-5-carboxylate synthase isoform X2
Glyma.08G121600	-1.61155	0.06532761963169999	-	uncharacterized protein LOC100800171
Glyma.14G209800	-0.0661346	0.828285	-	protein SET DOMAIN GROUP 40 isoform
Glyma.01G018300	-1.47317	0.0024592784251	down	ubiquitin carboxyl-terminal hydrolase 20
Glyma.04G156100	-8.65441	0.5101008361899999	-	hypothetical protein JHK87_010181
Glyma.07G220900	-0.407305	0.31452	-	DNA-directed RNA polymerases II, IV and
Glyma.20G093000	-0.00128774	0.7148543848019999	-	hypothetical protein GLYMA_20G093000v4
Glyma.03G117900	0.507865	0.07492993163869999	-	hypothetical protein GYH30_006964
Glyma.01G215300	-2.24459	0.606458	-	hypothetical protein GLYMA_01G215300v4
Glyma.17G149700	0	1	-	uncharacterized protein LOC114393586
Glyma.05G028400	0	1	-	hypothetical protein GYH30_011395
Glyma.13G115300	-0.546506	0.655804	-	Pectinesterase/pectinesterase inhibitor PPE8B
Glyma.01G235500	3.6603	0.0883688134152	-	hypothetical protein JHK86_002678
Glyma.06G009800	1.5151448135499999	0.000276668361774	up	hypothetical protein JHK87_013944
Glyma.13G289200	-2.17774	0.060874262707400005	-	cyanidin 3-O-galactoside 2''-O-xylosyltransferase FGGT1-like
Glyma.20G042200	0.648291	0.0135458767331	-	F-box protein At2g26850
Glyma.18G218850	0	1	-	hypothetical protein GLYMA_18G218850v4
Glyma.06G242700	-0.789484	0.438051	-	uncharacterized protein LOC100500415 precursor
Glyma.06G148100	-9.63946	0.44132968193300004	-	hypothetical protein JHK87_015238
Glyma.05G230600	0.696249	0.00860444190461	-	chloroplast processing peptidase
Glyma.14G110400	0	1	-	hypothetical protein GYH30_039685
Glyma.10G271300	0	1	-	hypothetical protein JHK84_029607
Glyma.01G156900	0	1	-	hypothetical protein GLYMA_01G156900v4
Glyma.06G095100	6.938364214139999	0.589342	-	uncharacterized protein At2g29880
Glyma.02G253200	0.311403	0.243557	-	hypothetical protein GLYMA_02G253200v4
Glyma.05G077500	0	1	-	hypothetical protein JHK87_012041
Glyma.17G210600	0	1	-	hypothetical protein GYH30_047983
Glyma.01G010900	-0.176984	0.934912	-	uncharacterized protein LOC100791210
Glyma.07G198000	0.6045854943760001	0.261047	-	VQ motif-containing protein 4 isoform X1
Glyma.03G075100	0.773568	0.65628	-	hypothetical protein GLYMA_03G075100v4
Glyma.16G195100	-0.48366	0.534727	-	putative pentatricopeptide repeat-containing protein At1g12700, mitochondrial
Glyma.05G109366	2.45077	0.185711	-	hypothetical protein GLYMA_05G109366v4
Glyma.13G295500	-1.51727	0.0064869206502600005	down	ADP,ATP carrier protein 3, mitochondrial
Glyma.10G033400	1.12888	0.635611	-	hypothetical protein JHK87_026686
Glyma.10G296266	7.58286	0.554675	-	uncharacterized protein LOC114369673
Glyma.03G027200	1.3251	0.22234865669300002	-	hypothetical protein GLYMA_03G027200v4
Glyma.13G125201	2.10552	0.07973724291119999	-	hypothetical protein GLYMA_13G125201v4
Glyma.06G308800	-0.324115	0.656368	-	protein STRICTOSIDINE SYNTHASE-LIKE 3
Glyma.16G117400	0.008873725884229999	0.850043	-	hypothetical protein GLYMA_16G117400v4
Glyma.13G348800	1.03416	0.0289415487676	-	heterogeneous nuclear ribonucleoprotein 1 isoform X1
Glyma.01G086600	0.261143	0.362228	-	mediator of RNA polymerase II transcription
Glyma.18G018750	0	1	-	hypothetical protein GLYMA_18G018750v4
Glyma.16G163100	-0.351578	0.607988	-	pentatricopeptide repeat-containing protein At1g62670, mitochondrial-like isoform
Glyma.02G227400	-2.44597	0.30837	-	hypothetical protein JHK87_004956
Glyma.03G168950	0	1	-	hypothetical protein GLYMA_03G168950v4
Glyma.08G157200	-0.108728	0.9492523351209999	-	E3 ubiquitin-protein ligase RMA1
Glyma.20G239900	-9.57918	0.45265520356399996	-	-
Glyma.15G063900	0	1	-	hypothetical protein GLYMA_15G063900v4
Glyma.06G077100	-0.450857	0.38982446531099996	-	putative peptidyl-tRNA hydrolase PTRHD1
Glyma.01G190500	-1.064	0.00179948363867	down	protein NONRESPONDING TO OXYLIPINS 2, mitochondrial
Glyma.11G084700	0.20830659121800002	0.252372	-	ubiquitin domain-containing protein DSK2a
Glyma.09G039900	-3.44312	0.008177514826890001	down	COBRA-like protein 7
Glyma.19G249000	-1.12787	0.00256024011851	down	peptidyl-prolyl cis-trans isomerase GmCYP11
Glyma.16G122100	8.79995	0.43185297893700003	-	receptor-like protein kinase THESEUS 1
Glyma.19G143300	0.177089	0.365897	-	probably inactive leucine-rich repeat receptor-like protein
Glyma.19G096900	-1.85902	0.09534547324110001	-	exocyst complex component EXO70B1-like
Glyma.01G184500	-1.58472	0.596951	-	hypothetical protein GYH30_002002
Glyma.04G202100	-1.53846	0.00375195148022	down	phosphatidylinositol transfer protein 3
Glyma.10G113500	-2.90735	0.00016718558228400002	down	protein MIZU-KUSSEI 1
Glyma.15G020800	-1.67765	0.0284613	-	mitochondrial-processing peptidase subunit alpha
Glyma.11G247900	-1.61941	0.000143494703599	down	hypothetical protein GYH30_032140
Glyma.18G058500	0	1	-	hypothetical protein JHK85_050113
Glyma.18G050600	1.97581	0.00036373313836400004	up	60S ribosomal protein L10-like
Glyma.05G137200	0	1	-	putative clathrin assembly protein At1g25240
Glyma.11G244500	0.531827	0.0498416730843	-	protein SDA1 homolog
Glyma.12G116900	2.7630757189899997	1.50235159631e-05	up	zinc finger CCCH domain-containing protein 2
Glyma.14G034750	0	1	-	hypothetical protein GLYMA_14G034750v4
Glyma.10G053800	-1.27658	0.005959557959680001	down	hypothetical protein GYH30_027050
Glyma.11G026100	0.837494	0.611944	-	hypothetical protein GYH30_029829
Glyma.13G320700	-0.046053	0.704752	-	protein SAAL1 isoform X1
Glyma.12G025500	-0.919462	0.0574700279592	-	NADH dehydrogenase
Glyma.19G117100	0	1	-	cation/calcium exchanger 1
Glyma.13G078100	0.0534817322467	0.8130266919399999	-	hypothetical protein GYH30_035473
Glyma.07G132600	-0.847603	0.26483461834000005	-	expansin precursor
Glyma.02G023700	0	1	-	TMV resistance protein N
Glyma.11G160400	-0.233955	0.774907	-	transcription initiation factor TFIID subunit 10
Glyma.08G043900	-0.714101	0.375919	-	aspartate--tRNA ligase, chloroplastic/mitochondrial isoform X1
Glyma.09G096300	-12.7895	0.000127436703806	down	probable E3 ubiquitin-protein ligase RHY1A isoform
Glyma.04G014700	-2.093	0.0888560938401	-	cysteine protease XCP2-like
Glyma.14G129700	0.5443177902049999	0.08788684723480002	-	uncharacterized protein LOC100781778 isoform X1
Glyma.19G049500	-0.194934	0.905922	-	enhancer of polycomb homolog 2
Glyma.18G042200	-0.656151	0.39116615604800004	-	receptor protein kinase TMK1
Glyma.08G013200	-0.115466	0.977939	-	probable LRR receptor-like serine/threonine-protein kinase At1g63430
Glyma.08G337000	-1.13234	0.14023631606599998	-	hypothetical protein GYH30_023247
Glyma.12G144800	0	1	-	hypothetical protein GLYMA_12G144800v4
Glyma.09G107466	0	1	-	hypothetical protein GLYMA_09G107466v4
Glyma.11G084800	10.3738	0.00598665773287	up	hypothetical protein GYH30_030431
Glyma.02G276600	-0.820011	0.09514989218480001	-	elongation factor 1-beta
Glyma.10G003200	-1.57018	0.011578667293799999	-	chlorophyllase-2
Glyma.14G196100	-0.927259	0.476381	-	hypothetical protein JHK86_040757
Glyma.18G063500	1.56518	0.00120964229159	up	ring finger domain-containing protein isoform 2
Glyma.18G010200	-0.768783	0.112453	-	probable thimet oligopeptidase isoform X1
Glyma.13G124100	-0.12835	0.868724	-	putative prefoldin subunit 2
Glyma.03G244600	0.0311288780736	0.585113	-	benzyl alcohol O-benzoyltransferase
Glyma.02G200300	-1.18377	0.00921695325064	-	40S ribosomal protein S17
Glyma.16G066300	-0.0870147	0.8221363179729999	-	pentatricopeptide repeat-containing protein At3g46610-like
Glyma.18G072600	0.779024	0.0245920866243	-	RNA-binding protein pno1
Glyma.09G272100	-1.6582	0.0156203827113	-	receptor-like protein EIX2 isoform X1
Glyma.13G110651	0	1	-	hypothetical protein GLYMA_13G110651v4
Glyma.09G087950	-0.621878	0.900244	-	hypothetical protein GLYMA_09G087950v4
Glyma.12G224200	-0.366513	0.39318301986500004	-	probable ubiquitin-conjugating enzyme E2 25 isoform
Glyma.17G012900	0.0596526	0.589989	-	hypothetical protein JHK86_046173
Glyma.03G198933	-9.05381	0.5943188886990001	-	hypothetical protein GLYMA_03G198933v4
Glyma.09G267400	-0.261023	0.829271	-	RecF/RecN/SMC N terminal domain-containing protein
Glyma.12G062600	1.1993177527399999	0.0114699625761	-	PGR5-like protein 1A, chloroplastic
Glyma.12G030600	-2.79322	0.00038132967628900003	down	PI-PLC X-box domain-containing protein DDB_G0293730
Glyma.05G138000	0	1	-	polcalcin Phl p 7
Glyma.05G062300	1.06355	0.00702477659455	up	MYB transcription factor MYB93
Glyma.10G288600	-0.639807	0.0539261752259	-	phytochrome-associated serine/threonine-protein phosphatase isoform X1
Glyma.08G060500	0.337054	0.325169	-	protein kinase isoform X2
Glyma.03G213000	-1.86849	0.222067	-	rapid alkalinization factor
Glyma.04G000400	-0.666	0.126071	-	alpha-1,3-mannosyl-glycoprotein 2-beta-N-acetylglucosaminyltransferase
Glyma.20G189300	-0.250546	0.735773	-	pyruvate kinase 1, cytosolic isoform X1
Glyma.14G019800	-2.73498	0.295002	-	hypothetical protein GYH30_038771
Glyma.02G144400	-1.70438	0.00403831928763	down	protein indeterminate-domain 12
Glyma.19G181800	-0.961198	0.751027	-	uncharacterized protein LOC100808952
Glyma.02G121500	-7.88468	0.683558	-	agamous-like MADS-box protein MADS2
Glyma.03G244000	0.632522	0.15630193155400002	-	uncharacterized protein LOC100792311 isoform X2
Glyma.12G054600	3.12533	0.014315441390799998	-	hypothetical protein GYH30_032791
Glyma.07G151600	0.272598	0.473671	-	protein DOG1-like 4
Glyma.03G194000	-1.38586	0.00395219653189	down	A20/AN1-like zinc finger protein
Glyma.07G184000	-1.30393	0.126381	-	L-type lectin-domain containing receptor kinase IX.1-like
Glyma.16G083700	-6.83437	0.716587	-	beta-galactosidase 15
Glyma.15G021100	0.980914	0.0022991639441	-	protein CHUP1, chloroplastic isoform X2
Glyma.08G312900	0	1	-	hypothetical protein JHK86_023148
Glyma.16G039600	0.655454	0.13446356310799998	-	spermidine hydroxycinnamoyl transferase
Glyma.10G276500	1.5842695770500002	0.0007300913130689999	up	glycine-rich RNA-binding protein RZ1C isoform X1
Glyma.02G311800	-0.356442	0.473971	-	calcium-dependent protein kinase 26
Glyma.09G015000	0	1	-	WEB family protein At1g12150
Glyma.02G029600	1.43305	0.0039011021174599997	up	chaperone protein dnaJ 16
Glyma.11G221700	8.95236	0.5987223871790001	-	hypothetical protein JHK85_032716
Glyma.10G122300	12.4133	0.00105560579334	up	beta-expansin precursor
Glyma.16G064700	-8.97859	0.60846	-	hypothetical protein GLYMA_16G064700v4
Glyma.09G247300	-0.575886	0.299591	-	uncharacterized protein LOC102667071
Glyma.12G004600	-2.69526	3.02908826918e-05	down	21 kDa protein-like
Glyma.11G189300	-1.28111	0.24825676807500002	-	hypothetical protein GYH30_031156
Glyma.05G039600	0	1	-	hypothetical protein JHK85_012060
Glyma.07G220400	4.12399	1	-	cytochrome P450 89A2
Glyma.09G062200	1.0677	0.0169630369284	-	uncharacterized protein LOC100500481
Glyma.02G018300	1.23919	0.016064006577399998	-	uncharacterized protein LOC100795813
Glyma.01G213600	-0.0957844	0.933467	-	probable LRR receptor-like serine/threonine-protein kinase At1g12460
Glyma.15G248800	0.657018	0.031369427922799994	-	uncharacterized protein LOC100816349
Glyma.03G084200	-4.25265	7.17552010559e-05	down	membrane protein of ER body 2
Glyma.19G104100	2.69622	0.131151	-	hypothetical protein GLYMA_19G104100v4
Glyma.18G201500	-0.243816	0.933621	-	E3 ubiquitin-protein ligase APD2
Glyma.09G109600	-1.03324	0.111477	-	protein trichome birefringence
Glyma.01G220900	0.0480405996751	0.940755	-	uncharacterized protein LOC100778407
Glyma.13G228400	-1.59089	0.0709021547621	-	CBL-interacting serine/threonine-protein kinase 12
Glyma.12G239000	-10.4922	0.35179757785800003	-	sm-like protein LSM7
Glyma.03G131000	-0.158513	0.981891	-	calmodulin binding protein PICBP-like
Glyma.06G137300	-2.81472	0.000217625686938	down	caffeic acid 3-O-methyltransferase
Glyma.15G240900	0	1	-	hypothetical protein JHK86_043531
Glyma.08G330800	1.02477	0.0030027506236799998	up	WEB family protein At5g55860
Glyma.05G176900	-3.16259	0.0008123432310349999	down	hypothetical protein JHK86_013290
Glyma.09G058900	-0.563104	0.353945	-	oxysterol-binding protein-related protein 4C isoform X2
Glyma.03G159300	2.5636	0.000351393130545	up	hypothetical protein GYH30_007380
Glyma.06G082800	1.1385428067299999	0.031100104315299998	-	TOM1-like protein 9 isoform X1
Glyma.20G060250	7.872808243250001	0.589342	-	myb-like protein J
Glyma.20G221200	-3.18554	0.022708560635500002	-	-
Glyma.19G216500	0.232487	0.34155	-	protein trichome birefringence-like 6
Glyma.01G025500	-0.367551	0.7532938832580001	-	protein DMR6-LIKE OXYGENASE 1
Glyma.12G146000	0	1	-	hypothetical protein GYH30_033749
Glyma.13G269800	-1.06296	0.00373067483846	down	uncharacterized protein LOC114373499
Glyma.18G207900	-1.48338	0.0172441953857	-	patellin-6
Glyma.03G204500	-0.119514	0.936633	-	uncharacterized protein LOC102660779
Glyma.10G195001	0.422592	0.708626	-	hypothetical protein GLYMA_10G195001v4
Glyma.12G015600	0.200046	0.235449	-	molecular chaperone DnaJ isoform X1
Glyma.02G058700	-0.251309	0.7670933594589999	-	scarecrow-like protein 15
Glyma.03G023700	-1.69164	0.0488647250582	-	probable leucine-rich repeat receptor-like protein kinase
Glyma.06G048000	0.9779176025990001	0.326315	-	hypothetical protein GYH30_014097
Glyma.09G275900	-0.330595	0.573553	-	serine/threonine-protein kinase STY13-like isoform X1
Glyma.20G237000	-0.660734	0.170052	-	-
Glyma.18G241900	0.049322296408799995	0.540506	-	protein METHYLENE BLUE SENSITIVITY 1
Glyma.20G184200	-1.10655	0.200837	-	transcription factor MYB13
Glyma.18G282500	-0.347343	0.791288	-	protein LAX PANICLE 2
Glyma.01G146200	0	1	-	hypothetical protein JHK87_001787
Glyma.03G255800	-1.83268	0.00801008966559	down	tubulin gamma-1 chain
Glyma.11G103900	0.220729	0.257285	-	transcription initiation factor TFIID subunit 15
Glyma.11G060800	2.4861658333700003	6.5898774707900005e-06	up	hypothetical protein JHK82_030206
Glyma.20G163200	-1.37199	0.0191089914607	-	probable WRKY transcription factor 27
Glyma.13G056900	-0.322032	0.7612119568819999	-	ribosome biogenesis protein WDR12 homolog isoform
Glyma.09G184450	0.217479	0.682055	-	hypothetical protein GLYMA_09G184450v4
Glyma.15G201200	0.779414	0.151106	-	putative pentatricopeptide repeat-containing protein At1g12700, mitochondrial
Glyma.13G196700	-2.58529	0.0381279817326	-	phosphatidylinositol 4-phosphate 5-kinase 6
Glyma.19G073200	0.641876	0.177332	-	LEAF RUST 10 DISEASE-RESISTANCE LOCUS RECEPTOR-LIKE
Glyma.10G073750	-0.712541	0.703379	-	hypothetical protein GLYMA_10G073750v4
Glyma.05G065700	-2.27661	0.0609738810304	-	expansin-like B1
Glyma.13G057000	1.9833199402000001	0.00458318	up	uncharacterized protein LOC102665676
Glyma.11G099100	0.579945	0.0949186407915	-	protein ELC-like
Glyma.07G025700	-0.355302	0.452419	-	uncharacterized protein LOC100776788
Glyma.01G085800	-0.0477071	0.934074	-	UDP-glycosyltransferase 83A1
Glyma.11G162700	-0.0319124	0.710933	-	pentatricopeptide repeat-containing protein At3g62890
Glyma.02G280200	0.33749952179399995	0.602996	-	hypothetical protein GYH30_005458
Glyma.08G109200	-2.41461	0.00134510277397	down	chalcone synthase 5
Glyma.14G140100	0	1	-	NAC domain-containing protein 59 isoform X2
Glyma.07G055000	-7.18286	0.716587	-	ethylene-responsive transcription factor ERF023
Glyma.10G219500	0.413739	0.0857886	-	cleavage stimulating factor 64
Glyma.18G204200	0.461291	0.423976	-	pyruvate decarboxylase 2
Glyma.15G048600	0.934134	0.038204510212400004	-	mitogen-activated protein kinase kinase kinase 1
Glyma.08G362400	-0.348907	0.42339053408200006	-	clathrin interactor EPSIN 2
Glyma.U031413	-9.57229	4.7364050291099996e-11	down	peroxidase precursor
Glyma.19G012900	-0.562941	0.376728	-	hypothetical protein GLYMA_19G012900v4
Glyma.06G310300	-8.47105	0.695369	-	late embryogenesis abundant protein 6
Glyma.17G044700	-1.57464	0.12467428505200001	-	hypothetical protein JHK84_046477
Glyma.01G006500	1.28352	0.009923663317229998	-	DNA-directed RNA polymerase III subunit 2
Glyma.01G243600	-0.469559	0.42777145299099995	-	alpha-L-fucosidase 2
Glyma.16G119100	0	1	-	hypothetical protein GLYMA_16G119100v4
Glyma.07G256400	-2.19711	0.05960826676850001	-	hypothetical protein JHK85_020298
Glyma.09G263551	0.13323	0.705418	-	hypothetical protein GLYMA_09G263551v4
Glyma.07G197500	2.80196	0.142485	-	uncharacterized protein LOC100811868
Glyma.07G269100	-1.38799	0.0147852423957	-	BTB/POZ domain-containing protein At5g47800 isoform X4
Glyma.03G017350	9.69585	0.554675	-	hypothetical protein GLYMA_03G017350v4
Glyma.06G259100	-1.50602	0.358443	-	hypothetical protein GLYMA_06G259100v4
Glyma.08G007601	-9.01137	0.8699851219760001	-	hypothetical protein GLYMA_08G007601v4
Glyma.15G180800	-0.760136	0.7584977278499999	-	hypothetical protein JHK86_042724
Glyma.08G008600	-0.932626	0.123885	-	dual specificity protein phosphatase PHS1 isoform
Glyma.20G136400	0	1	-	agamous-like MADS-box protein AGL62
Glyma.19G151900	8.347990391469999	0.7582899692849999	-	hypothetical protein GLYMA_19G151900v4, partial
Glyma.20G172900	0.476453	0.234006	-	hypothetical protein JHK86_056515
Glyma.13G200700	0	1	-	hypothetical protein JHK85_037523
Glyma.10G259000	1.20699	0.00866794313319	up	protein FAR-RED IMPAIRED RESPONSE 1 isoform
Glyma.08G159100	-1.01528	0.211721	-	uncharacterized protein LOC100783235
Glyma.04G088800	0.434284	0.145043	-	receptor-like protein kinase 7
Glyma.06G287000	-1.44725	0.0122756864451	-	uncharacterized protein LOC100527118
Glyma.14G196200	-0.018611	0.865088	-	zinc transporter 6, chloroplastic
Glyma.18G278150	0	1	-	hypothetical protein GLYMA_18G278150v4
Glyma.18G001600	0	1	-	cation/H(+) antiporter 3
Glyma.06G153400	-0.638415	0.444641	-	NAD(P)H-quinone oxidoreductase subunit O, chloroplastic-like
Glyma.20G104800	1.13749	0.047542354633900004	-	hypothetical protein JHK85_056895
Glyma.11G178300	0.538243	0.333789	-	calmodulin-binding receptor-like cytoplasmic kinase 2
Glyma.15G273800	-0.995169	0.225984	-	hypothetical protein GYH30_043633
Glyma.05G080200	0.501065	0.6921411903650001	-	protein PHYTOCHROME KINASE SUBSTRATE 4
Glyma.18G028000	-0.531741	0.38297805791699996	-	putative ABC1 protein At2g40090
Glyma.20G139802	1.51865	0.050849740748899995	-	serine/threonine kinase-like protein isoform X1
Glyma.13G047100	1.76668	7.719096894300001e-05	up	uncharacterized protein LOC100805793
Glyma.14G010700	-0.370743	0.7214449713330001	-	uncharacterized protein LOC102665099
Glyma.19G241700	0	1	-	aldehyde oxidase GLOX
Glyma.16G065000	-1.36177	0.20518683654300002	-	hypothetical protein GLYMA_16G065000v4
Glyma.16G079300	0.8429597122050001	0.571235	-	hypothetical protein JHK86_044692
Glyma.18G087600	0	1	-	hypothetical protein GLYMA_18G087600v4
Glyma.14G106300	8.53979	0.5987223871790001	-	hypothetical protein JHK87_039412
Glyma.04G177300	0.39767	0.0821864242329	-	MYB transcription factor MYB143
Glyma.05G205400	-0.846621	0.518829	-	CLE15 protein
Glyma.16G146500	-0.118414	0.904617	-	long chain base biosynthesis protein 2a
Glyma.04G048800	0	1	-	CSC1-like protein RXW8
Glyma.10G128932	0	1	-	hypothetical protein GLYMA_10G128932v4
Glyma.11G238000	9.62707	0.320571	-	Heavy metal-associated isoprenylated plant protein 23-like
Glyma.13G371400	-0.8172	0.24326425890999998	-	hypothetical protein JHK85_039114
Glyma.03G199600	0	1	-	secoisolariciresinol dehydrogenase
Glyma.04G079600	-0.145188	0.9299725430779999	-	BURP domain protein RD22
Glyma.11G167100	0.29913	0.583803	-	inactive receptor-like serine/threonine-protein kinase At2g40270
Glyma.14G089090	1.03402	0.018007816250200002	-	growth-regulating factor 1
Glyma.13G239800	1.1478150365000002	0.631909	-	uncharacterized protein LOC112998763
Glyma.06G013700	-8.4004	0.683558	-	hypothetical protein GYH30_013758
Glyma.17G188600	-0.244011	0.847949	-	26S proteasome non-ATPase regulatory subunit 11
Glyma.16G149900	1.3847649747100002	0.007572361076709999	up	INO80 complex subunit D-like
Glyma.14G073300	1.5575	0.006959268098470001	up	hypothetical protein GLYMA_14G073300v4
Glyma.14G056300	1.51398	0.0342883653773	-	abscisic acid receptor PYL4
Glyma.05G039800	-0.608378	0.32159065475000004	-	uncharacterized protein LOC100782442
Glyma.01G029700	1.16214	0.134592	-	hypothetical protein GLYMA_01G029700v4
Glyma.03G083700	0	1	-	agamous-like MADS-box protein AGL80
Glyma.10G066750	0	1	-	hypothetical protein GLYMA_10G066750v4
Glyma.19G020300	0.416983	0.1028	-	uncharacterized protein LOC100818221
Glyma.05G102300	-0.172524	0.9137932614059999	-	uncharacterized protein LOC100802794
Glyma.10G070900	1.26911	0.0217434146753	-	zinc finger A20 and AN1 domain-containing
Glyma.09G015800	0.557533	0.0692925	-	protein phosphatase 1 regulatory inhibitor subunit
Glyma.07G082600	-0.385783	0.47542494939900004	-	receptor-like serine/threonine-protein kinase At2g45590
Glyma.10G121100	0	1	-	RING-H2 finger protein ATL70
Glyma.16G201600	-0.0918957	0.820067	-	hypothetical protein GYH30_045557
Glyma.20G075100	-0.992116	0.00813028072998	-	U2 small nuclear ribonucleoprotein A'-like
Glyma.03G043500	-0.332528	0.6087047609130001	-	putative disease resistance protein At3g14460 isoform
Glyma.02G018000	-0.635928	0.22206140184099998	-	hypothetical protein GLYMA_02G018000v4
Glyma.04G180500	0	1	-	spermidine synthase 1-like
Glyma.18G109800	-0.0801203	0.7678	-	protein VACUOLELESS1
[truncated: 50,873 more rows]
